1 **Genomic signatures of extensive inbreeding in Isle Royale wolves, a**  
2 **population on the threshold of extinction**

3  
4 Jacqueline A. Robinson<sup>1,2\*</sup>, Jannikke Räikkönen<sup>3</sup>, Leah M. Vucetich<sup>4</sup>, John A. Vucetich<sup>4</sup>, Rolf  
5 O. Peterson<sup>4</sup>, Kirk E. Lohmueller<sup>1,5,6†</sup>, Robert K. Wayne<sup>1†</sup>

6  
7 <sup>1</sup>Department of Ecology and Evolutionary Biology, University of California, Los Angeles

8 <sup>2</sup>Institute for Human Genetics, University of California, San Francisco (present address)

9 <sup>3</sup>Department of Environmental Research and Monitoring, Swedish Museum of Natural History

10 <sup>4</sup>School of Forest Resources and Environmental Science, Michigan Technological University

11 <sup>5</sup>Interdepartmental Program in Bioinformatics, University of California, Los Angeles

12 <sup>6</sup>Department of Human Genetics, David Geffen School of Medicine, University of California,  
13 Los Angeles

14  
15 \* Corresponding author: Jacqueline A. Robinson ([jacqueline.robinson@ucsf.edu](mailto:jacqueline.robinson@ucsf.edu))

16  
17 † These authors contributed equally to this work.

18

## 19 **Abstract**

20           The observation that small, isolated populations often suffer reduced fitness as a result of  
21 inbreeding depression has guided conservation theory and practice for decades. However,  
22 investigating the genome-wide dynamics associated with inbreeding depression in natural  
23 populations is only now feasible with relatively inexpensive sequencing technology and  
24 annotated reference genomes. To characterize the genome-wide effects of intense inbreeding and  
25 isolation, we sequenced complete genomes from an iconic inbred population, the gray wolves  
26 (*Canis lupus*) of Isle Royale. Through comparison with other wolf genomes from a variety of  
27 demographic histories, we found that Isle Royale wolf genomes contain extensive runs of  
28 homozygosity, but neither the overall level of heterozygosity nor the number of deleterious  
29 variants per genome were reliable predictors of inbreeding depression. These findings are  
30 consistent with the hypothesis that severe inbreeding depression results from increased  
31 homozygosity of strongly deleterious recessive mutations, which are more prevalent in  
32 historically large source populations. Our results have particular relevance in light of the recently  
33 proposed reintroduction of wolves to Isle Royale, as well as broader implications for  
34 management of genetic variation in the fragmented landscape of the modern world.

35

## 36 **Introduction**

37           Under increasing human population pressure, many species with once continuous ranges  
38 have been reduced to small, fragmented populations (Ceballos and Ehrlich 2014). Higher levels  
39 of inbreeding in such small populations may elevate the risk of extinction through inbreeding  
40 depression. Large carnivores are particularly susceptible, since they typically have lower  
41 population densities relative to the herbivores they prey on, and they often require extensive

42 natural areas to persist. Further, they are frequently persecuted because of real or perceived  
43 threats to humans and livestock (Ripple et al. 2014). Some well-known examples of inbreeding  
44 depression in the wild have been observed in large carnivores, such as Florida panthers (*Puma*  
45 *concolor*, Roelke et al. 1993) and gray wolves (Liberg et al. 2005; Rakkonen et al. 2006, 2009).  
46 Studies of inbred wolves in the wild and in captivity have found elevated rates of blindness,  
47 cryptorchidism, heart and kidney defects, dental anomalies, and vertebral malformations, as well  
48 as decreased reproduction, litter size, body weight, and longevity (Laikre and Ryman 1991;  
49 Laikre et al. 1993; Liberg et al. 2005; Fredrickson et al. 2007; Rakkonen et al. 2013; Akesson et  
50 al. 2016). Phenotypic defects associated with inbreeding are not limited to carnivores, however,  
51 and have been observed in numerous plant and animal species (Keller and Waller 2002).  
52 Quantifying and maintaining genetic diversity to minimize the risk of inbreeding depression  
53 therefore remains a fundamental goal of conservation biology.

54         Although it has been studied for more than a century, the underlying genetic basis of  
55 inbreeding depression remains unclear. Previous studies largely support the hypothesis that  
56 inbreeding leads to increased homozygosity of strongly deleterious recessive alleles, which are  
57 hidden from selection by remaining in the heterozygous state in large outbreeding populations  
58 (reviewed in Charlesworth and Willis 2009). However, the adverse consequences of small  
59 population size have been debated, in part because theory predicts that smaller populations may  
60 actually have an enhanced capacity for purging strongly deleterious recessive mutations (Hedrick  
61 and Garcia-Dorado 2016). With the ever-decreasing costs of whole genome sequencing, it is now  
62 feasible to estimate the genome-wide burden of deleterious variants (genetic load) (eg.  
63 Lohmueller et al. 2008; Renaut and Rieseberg 2015; Marsden et al. 2016). However, recent  
64 studies have primarily dealt with the effects of long-term reduced population size or ancient

65 bottlenecks, such as in non-African human populations or in domesticated species, rather than  
66 inbreeding in small populations. Additionally, studies have focused on the excess of deleterious  
67 variants associated with expanding populations (Peischl and Excoffier 2015). Generally, small  
68 increases in the number of derived deleterious variants per genome (additive genetic load) due to  
69 ancient bottlenecks or long-term reduced effective population size have been observed, but the  
70 genomic effects of severe inbreeding may have a distinct impact on patterns of deleterious  
71 variation.

72         In this study, we present results from complete genome sequencing of a small highly  
73 inbred population of wolves on Isle Royale in Lake Superior that has been under annual  
74 observation almost since its founding, serving as a model system for the study of ecological and  
75 behavioral dynamics, as well as conservation genetics for decades (eg. Allen and Mech 1963;  
76 Wayne et al. 1991; Peterson et al. 2014). The island was likely first colonized by two to three  
77 wolves that crossed frozen Lake Superior from the mainland in the 1940s, establishing a  
78 population on Isle Royale that, at its peak, included approximately 50 individuals (Peterson et al.  
79 2014). Following a disease outbreak in the early 1980s, the population crashed to 14 individuals  
80 and failed to rebound for approximately 15 years. The population exhibited a significant but  
81 short-lived improvement in numbers as a response to genetic rescue after a single wolf migrated  
82 from the mainland in 1997, before falling to even lower numbers by 2010 (Adams et al. 2011;  
83 Hedrick et al. 2014; Peterson et al. 2014). The population is now extremely inbred, and has  
84 continued to wane while exhibiting signs of severe inbreeding depression (Räikkönen et al. 2009;  
85 Hedrick et al. 2014). A pair of wolves, both father-daughter and half-siblings, descended from a  
86 legacy of repeated close inbreeding events, were the only individuals that remained by early  
87 2018, by which time they were either in or approaching senescence. No successful reproduction

88 has occurred since 2014 (Peterson and Vucetich 2017), and the population is expected to  
89 disappear without the reintroduction of wolves by humans, a move that is under review by the  
90 National Park Service. Although previous investigation of Isle Royale wolves focused on  
91 inbreeding using genetic assays (Wayne et al. 1991; Adams et al. 2011; Hedrick et al. 2014), or  
92 morphological assessment (Räikkönen et al. 2009), this is the first study to combine both  
93 approaches, and to use complete genome sequence data.

94 In the past, levels of diversity at relatively few loci have been used to make inferences  
95 about the genetic health of populations. These methods may be misleading, because the  
96 relationship between heterozygosity and inbreeding depression is not straightforward, but  
97 depends on the nature of segregating deleterious variation, which is influenced by demographic  
98 history. Our analysis of complete genomes supports the importance of the genomic landscape in  
99 assessments of inbreeding. We find that inbreeding depression is likely caused by increased  
100 homozygosity of strongly deleterious recessive mutations due to recent inbreeding, rather than an  
101 overall increase in the burden of deleterious alleles due to long-term small population size. These  
102 results have implications for understanding the genetic basis of inbreeding depression and for the  
103 effective management of small isolated populations, particularly those recently derived from  
104 large outbred populations, as is the case for many species threatened by habitat fragmentation  
105 and loss due to recent human impacts on the landscape.

106

## 107 **Results**

### 108 *Genomic data set*

109 We obtained genetic samples from eleven Isle Royale wolves collected between 1988 and  
110 2012 for whole genome sequencing and analysis (Table S1). The population size on the island

111 was estimated to number 8-30 individuals during this period (Peterson and Vucetich 2017). A  
112 pedigree, adapted from Hedrick et al. (2014), shows the relationships of the sequenced wolves  
113 (where known), as well as inbreeding events between close relatives (Fig. 1A). Based on this  
114 pedigree, the wolves in our dataset include inbred and putatively non-inbred individuals, with  
115 inbreeding coefficients ranging from 0 to 0.375.

116 We supplemented the Isle Royale wolf genome sequences with publicly available and  
117 newly generated genomes from other wolves and related species (Fig. 1B, Table S1). In addition  
118 to the Isle Royale wolves, our complete dataset includes six mainland wolves from nearby  
119 Minnesota, nine gray wolves from elsewhere in North America, six Eurasian gray wolves, and a  
120 single genome from each of the following species: red wolf (*C. rufus*), coyote (*C. latrans*), and  
121 Ethiopian wolf (*C. simensis*). All genomes were aligned, genotyped, and annotated with respect  
122 to the domestic dog reference genome (canFam3.1), yielding mean genome-wide coverage  
123 values of 9-49X after read filtering (Table S1). We polarized alleles as ancestral or derived using  
124 genomes from an African golden wolf (*C. anthus*) and a gray fox (*Urocyon cinereoargenteus*). A  
125 cladogram showing the phylogenetic relationships between wolf populations and sister taxa is  
126 shown in Fig. S1. Our dataset spans the Holarctic range of the gray wolf and contains individuals  
127 derived from a variety of demographic histories that feature recent inbreeding, long-term small  
128 population size, isolation, and admixture (Table S2). To our knowledge, Isle Royale and  
129 Mexican wolves are the only populations we sampled that suffer from documented inbreeding  
130 depression (Fredrickson et al. 2007; Räikkönen et al. 2009).

131

132 *Phenotypic evidence of inbreeding depression in Isle Royale wolves*

133           The wolf spinal column is composed of seven cervical (C1–7), thirteen thoracic (T1–13),  
134 seven lumbar (L1–7), and three fused sacral (S1–3) vertebrae from atlas to sacrum, plus ~20  
135 coccygeal vertebrae (Co1–22) in the tail. A 2009 study found a high prevalence of vertebral  
136 anomalies in Isle Royale wolves sampled between 1964 and 2007, including extra vertebrae, and  
137 defects such as thoracolumbar, lumbosacral, and sacrococcygeal transitional vertebrae  
138 (exhibiting characteristics of two different types of vertebrae), as well as vertebrae with severe  
139 asymmetries (Räikkönen et al. 2009). We examined skeletal remains collected post-mortem from  
140 6 of the 11 wolves sequenced for this study, as well as a litter of 8 pups, to identify congenital  
141 malformations, specifically in the spine and rib cage. Only one of these specimens was part of  
142 the 2009 study (F65). The incidence of observed anatomical defects was high. One individual  
143 was free of aberrations (M61) and one (F65) had a minor transitional variation, whereas the  
144 remaining individuals (F75, M152, M175, F189) possessed 2-4 abnormalities each, including  
145 transitional vertebrae, extra vertebrae, and extra ribs (Table 1). One wolf, F75, was the product  
146 of a brother-sister mating, and had three transitional vertebrae and an extra pair of ribs. This wolf  
147 died while giving birth to a litter of pups thought to have been sired by her father, M62 (Hedrick  
148 et al. 2014). The pups died within hours, and our examination revealed that all eight had extra  
149 vertebrae, and all but one had extra ribs.

150           The fitness effects of the vertebral defects observed in Isle Royale wolves are not clear,  
151 but lumbosacral transitional vertebrae (LSTV) in dogs are reportedly a predisposing factor of  
152 cauda equina syndrome, which can cause severe pain, incontinence, gait problems and paralysis  
153 (Morgan et al. 1993; Flückiger et al. 2006). LSTV are also reportedly related to asymmetrical hip  
154 joint development and secondary osteoarthritis (Flückiger et al. 2017). There are many  
155 phenotypic variations of LSTV (Morgan et al. 1993; Damur-Djuric et al. 2006); wolf F65

156 exhibited only a minor aberration that presumably would have no impact on fitness. Two other  
157 wolves with LSTV (F75, M175) showed severe changes with a combination of malformed  
158 features. Rarely observed in large, outbred wolf populations, LSTV were previously shown to  
159 have steadily increased in prevalence in Isle Royale wolves between 1964 and 2007, a period in  
160 which the Isle Royale wolf population became increasingly inbred (Räikkönen et al. 2009). The  
161 incidence of LSTV in outbred wolf populations in Finland and historic Scandinavia is 0-1%,  
162 compared to 10% in modern inbred Scandinavian wolves, and 33% in Isle Royale wolves prior  
163 to 2007 (Räikkönen et al. 2006, 2009).

164         Additionally, three of the six specimens (F75, M152, M175) also exhibited spondylosis  
165 deformans, a condition in which the vertebrae possess varying degrees of bone spurs  
166 (osteophytes) and bony bridges across the vertebral disc space (Kranenburg et al. 2011). These  
167 lesions are not congenital, but are a degenerative change commonly related to age (Larsen and  
168 Selby 1981; Kranenburg et al. 2011) that may also form as a result of traumatic fractures or  
169 abnormal vertebral anatomy and alignment (Morgan et al. 1989). Two specimens (F75 and  
170 M152) had severe spondylosis that may have affected their spinal mobility. In sum, wolves on  
171 Isle Royale suffer from a suite of vertebral changes including types that can impair mobility and  
172 fitness, which are rarely observed in outbred wolves.

173

#### 174 *Genome-wide patterns of variation shaped by demographic history*

175         To assess how demographic history has shaped spatial patterns of diversity across the  
176 genome, we calculated per-site heterozygosity in non-overlapping 1 Mb windows within each  
177 individual (Fig. 2, S2). Qualitatively, we observed three distinct patterns of genome-wide  
178 heterozygosity: 1) genomes with high heterozygosity throughout (Fig. 2A, B); 2) genomes with



179 low heterozygosity throughout (Fig. 2C, D); and 3) genomes with a sawtooth-like pattern  
180 characterized by regions of high heterozygosity interspersed by long runs of homozygosity  
181 (ROH) devoid of variation (Fig. 2E, F). We observed high heterozygosity across the entire  
182 genome in individuals derived from outbred populations with large long-term effective  
183 population sizes, such as lowland Chinese (Xinjiang) and Minnesota wolves (Gray et al. 2009;  
184 vonHoldt et al. 2011, 2016; Fan et al. 2016). Conversely, low heterozygosity across the genome  
185 was associated with a history of isolation and small long-term effective population size, such as  
186 in Ethiopian and Tibetan wolves (Gottelli et al. 1994, 2004; Zhang et al. 2014; Fan et al. 2016).  
187 Finally, the sawtooth-like pattern characterized by long ROH was observed in individuals with a  
188 history of recent inbreeding, as in the Isle Royale and Mexican wolves (Hedrick et al. 2014;  
189 Fredrickson et al. 2007). In some cases, ROH spanned entire chromosomes, consistent with the  
190 predictions of a prior simulation study based on the pedigree of the Isle Royale wolf population  
191 (Hedrick et al. 2016).

192 Pedigree-based inbreeding coefficients ( $F_{\text{PED}}$ ) are predictions of the proportion of the  
193 genome that is contained within ROH ( $F_{\text{ROH}}$ ), which are chromosomal segments inherited  
194 identically by descent (IBD) from a common ancestor. We calculated that 23-47% of the Isle  
195 Royale wolf genomes were contained within ROH greater than 100 kb in length, which is  
196 significantly greater than  $F_{\text{ROH}}$  in Minnesota wolves, who carry 12-24% of their genomes within  
197 ROH (Mann-Whitney U (MWU) test,  $p=3.23 \times 10^{-4}$ ) (Fig. 3). Our dataset includes several  
198 individuals for which we have no genealogical records (F25, F55, M61, F67), since the pedigree  
199 only includes Isle Royale wolves genotyped between 1998-2013. Among the pedigreed wolves  
200 ( $n=7$ ),  $F_{\text{PED}}$  values ranged from 0 to 0.375. We used linear regression to evaluate the relationship  
201 between  $F_{\text{PED}}$  and  $F_{\text{ROH}}$  in the Isle Royale wolves. Pedigree-based inbreeding coefficients ( $F_{\text{PED}}$ )

202 often underestimate the true proportion of the genome contained within ROH ( $F_{ROH}$ ) because  
203 they fail to capture ancient or background levels of inbreeding, particularly when the pedigree is  
204 shallow, as is the case for Isle Royale wolves. The slope of the regression was shallow (0.426,  
205  $p=0.0238$ ) and the correlation between  $F_{PED}$  and  $F_{ROH}$  was modest (0.607,  $p=0.024$ ), reflecting  
206 the limitations of the pedigree and the small number of samples. Nonetheless,  $F_{PED}$  (where  
207 known) always underestimated  $F_{ROH}$  (intercept=0.297,  $p=9.95 \times 10^{-5}$ ) (Fig. 3A), consistent with a  
208 prior history of inbreeding not captured by the pedigree. In other words, recent severe inbreeding  
209 in Isle Royale wolves has sharply increased homozygosity across the genome, beyond the  
210 expected values suggested by the known pedigree.

211         Reduced heterozygosity in Isle Royale wolf genomes is due to the presence of extremely  
212 long ROH (>10 Mb). Overall, genome-wide heterozygosity in Isle Royale wolves (0.94-1.43  
213 heterozygotes per kb) is 11-41% lower than the mean heterozygosity of wolves from nearby  
214 mainland Minnesota (1.60 heterozygotes per kb) (Fig. 3B). Although total heterozygosity within  
215 the genome correlates with the total amount of the genome within ROH, it does not reflect the  
216 distribution of ROH lengths, which is shaped by demographic history (Fig. 3B). The expected  
217 genetic map length of an IBD tract is inversely proportional to the number of generations (ie. the  
218 number of recombination events) since the common ancestor of the chromosomal segment  
219 (Thompson 2013). Thus, long ROH indicate recent inbreeding, whereas shorter ROH indicate  
220 ancient common ancestry. Isle Royale wolves contain 14-35 long ROH (>10 Mb) per individual,  
221 whereas Minnesota wolves contain just 1-9 long ROH per individual (Fig. S3). Long ROH are  
222 also prevalent in the genomes of the inbred Mexican wolf and the Ellesmere Island wolf, the  
223 latter suspected but not previously known to be inbred (Carmichael et al. 2008) (Fig. 3B, S3).  
224 The Mexican wolf genome derives from the highly inbred Ghost Ranch lineage, before measures

225 were taken in the Mexican wolf captive breeding program to decrease the level of inbreeding.  
226 The increase in long ROH, but not shorter ROH, in Isle Royale wolf genomes is consistent with  
227 their recent descent from mainland wolves, which bear few ROH of any length and have high  
228 heterozygosity across their entire genomes.

229 In contrast, the Tibetan and Ethiopian wolf genomes contain many shorter ROH,  
230 resulting from long-term small effective population sizes, but few long ROH, suggesting no  
231 recent inbreeding (Fig. S3). Notably, these wolves have lower genome-wide heterozygosity than  
232 the Isle Royale wolves (Fig. 3B). The Tibetan wolf contained the highest number of short ROH  
233 (0.1-1 Mb) and the Ethiopian wolf genome contained the highest number of medium-sized ROH  
234 (1-10 Mb) (Fig. S3). Both the Ethiopian and Tibetan wolves exist in small isolated populations  
235 (Gottelli et al. 1994, 2004; Zhang et al. 2014; Fan et al. 2016). However, neither the Tibetan wolf  
236 nor the Ethiopian wolf is known to suffer from inbreeding depression. In fact, Ethiopian wolves  
237 are thought to practice inbreeding avoidance (Sillero-Zubiri et al. 1996; Randall et al. 2007).  
238 Since the Tibetan and Ethiopian wolves are not thought to suffer from inbreeding depression,  
239 these results imply that the intensity and timing of inbreeding are key factors modulating the risk  
240 of inbreeding depression.

241

#### 242 *The genetic basis of inbreeding depression in Isle Royale wolves*

243 Although the distribution of ROH number and length within a genome are informative  
244 about past inbreeding, it is still unclear how the genomic landscape of heterozygosity impacts  
245 fitness. To explore this relationship, we focused on protein-coding regions of the genome, which  
246 are more likely to directly affect fitness, and are also more amenable to functional interpretation.  
247 As the proportion of the genome contained within ROH increases, the amount of coding

248 sequence contained within ROH increases linearly ( $R^2=0.994$ ,  $p<2.20 \times 10^{-16}$ ) (Fig. S4). Thus,  
249 ROH are not enriched for coding regions beyond that expected for their genome-wide  
250 distribution, suggesting it is not an increase in the proportion of coding regions in ROH that  
251 causes inbreeding depression. Neither the overall homozygosity of a genome nor its coding  
252 regions is a reliable predictor of inbreeding depression, suggesting that the homozygosity of a  
253 small subset of variants have a disproportionate effect on fitness.

254 To assess the putative biological effects of particular mutations, we annotated variants in  
255 coding regions with respect to their impact on the encoded amino acid (eg. synonymous, non-  
256 synonymous, etc.) using the Variant Effect Predictor (VEP, McLaren et al. 2010), and further  
257 classified non-synonymous SNPs as likely to be deleterious or tolerated with the Sorting  
258 Intolerant From Tolerant (SIFT, Kumar et al. 2009) algorithm, which predicts whether missense  
259 mutations are likely to be deleterious or tolerated on the basis of amino acid conservation at a  
260 site across taxa. We then classified all variants as putatively damaging or benign. Here,  
261 synonymous and tolerated missense mutations comprise the benign group, whereas deleterious  
262 missense mutations, and mutations that disrupt splice sites or start or stop codons comprise the  
263 damaging group. Studies in humans have revealed that long ROH are enriched for homozygous  
264 deleterious variants (Szpiech et al. 2013). We did not observe enrichment of deleterious variants  
265 within ROH in our dataset (Fig. S5). However, the comparison of our results with those obtained  
266 in humans is complicated by biological differences (e.g. highly divergent demographic histories  
267 sampled within our study) and technical differences between studies (e.g. different methods for  
268 identifying and classifying ROH, potential misclassification of deleterious versus benign variants  
269 in wolves).

270 To control for long-term demographic history and to gauge how recent inbreeding has  
271 impacted patterns of variation in coding regions in Isle Royale wolf genomes, we focused  
272 specifically on comparing Isle Royale genomes to those of the mainland Minnesota wolves,  
273 which have a shared history until the recent founding of the Isle Royale population. Overall, both  
274 damaging and benign variants in Isle Royale wolves have shifted from the heterozygous to the  
275 homozygous state (Fig. 4A, B). The proportion of damaging homozygous genotypes was 4.07%  
276 higher (MWU  $p=3.23 \times 10^{-4}$ ) in Isle Royale compared to the mainland, and 3.84% higher (MWU  
277  $p=6.46 \times 10^{-4}$ ) for tolerated homozygotes (Fig. 4B). However, the total proportion of derived  
278 alleles per genome across the Minnesota and Isle Royale wolves was unchanged for both  
279 damaging and benign mutations (MWU  $p>0.52$ ) (Fig. 4C), consistent with population genetic  
280 theory, as inbreeding distorts genotype frequencies rather than allele frequencies. Further,  
281 because the founding of the Isle Royale population was very recent (~16 generations ago,  
282 assuming 4.2 years/generation; Peterson et al. 1998) and its numbers have remained low, an  
283 accumulation of new deleterious variants entering the population through mutation or extensive  
284 drift of existing weakly deleterious variants would not be expected. In other words, inbreeding  
285 depression in Isle Royale wolves cannot be explained by an increase in the number of derived  
286 deleterious variants per genome, which may be proportional to the additive genetic load. Rather,  
287 it must be accounted for by the increased homozygosity of deleterious variants.

288 Even strongly deleterious recessive alleles are expected to be present in standing genetic  
289 variation, segregating at low frequencies in large populations where drift is minimal and  
290 inbreeding is rare. In contrast, variants that are at high frequency in large populations of outbred  
291 wolves are not likely to be strongly deleterious. Thus, in the absence of appreciable gene flow  
292 with the mainland, we predicted that strongly deleterious recessive alleles carried in the founder

293 genomes could have attained high frequency within the Isle Royale population. This  
294 phenomenon has been observed in the increased prevalence of rare genetic disorders in founder  
295 populations of humans (reviewed by Sheffield et al. 1998) and purebred dogs (reviewed by  
296 Sutter and Ostrander 2004). We compared the frequencies of segregating variants in Isle Royale  
297 wolves and mainland Minnesota wolves to those of outbred North American wolves by  
298 constructing two-dimensional allele frequency spectra, and performing linear regression to assess  
299 correlations between populations (Fig. 4D-G, Table S3). For this analysis, all groups were down-  
300 sampled to 10 chromosomes (5 individuals) each. We found that variants with low frequency in  
301 outbred North American wolves are also typically at low frequency in mainland Minnesota  
302 wolves, consistent with weak drift and efficient selection (Fig. 4F, G, Table S3). In contrast, non-  
303 synonymous variants in Isle Royale wolves had higher frequencies due to the effects of isolation  
304 and high relatedness among individuals (Fig. 4D, E). Further, for both damaging and benign  
305 variant classes, derived allele frequencies in Isle Royale had lower correlations with allele  
306 frequencies in outbred wolves compared to Minnesota wolves, consistent with our prediction that  
307 the founder effect and inbreeding in Isle Royale wolves allowed damaging variants to attain high  
308 frequency ( $p < 2.22 \times 10^{-16}$ ).

309 We predicted that these damaging variants might account for the high incidence of  
310 vertebral anomalies observed in Isle Royale wolves. We used the following criteria to identify  
311 candidate deleterious variants underlying the phenotypes of Isle Royale wolves in our dataset: 1)  
312 homozygous and located within ROH in the affected individuals (F65, F75, M152, M175, F189)  
313 but heterozygous or absent in the unaffected individual (M61); and 2) low frequency (<10%)  
314 among other gray wolves ( $n=21$ ). 263 genes containing such mutations were found in at least one  
315 affected individual, and two of these genes contained mutations in all five affected individuals:

316 *RTTN* and *SCUBE2*. Only *RTTN* (rotatin) is known to be associated with abnormal phenotypes,  
317 and notably affects vertebral development. *RTTN* is a large, highly conserved gene with 49  
318 exons, spanning 144 kb on chromosome 1 of the dog genome.

319 Using a mouse model, researchers have found that *RTTN* plays an essential role in early  
320 embryonic development, specifically in left-right specification, embryo turning, and notochord  
321 formation (Faisst et al. 2002). Embryos with *RTTN* knocked out were inviable, but developed  
322 normally with one functional gene copy. The five Isle Royale wolves with vertebral  
323 malformations are homozygous for a C to T transition that converts a leucine residue to  
324 phenylalanine in exon 11 of *RTTN*. The SIFT score for this mutation is 0, indicating very strong  
325 conservation at this site, and that this mutation is therefore predicted to have a deleterious effect.  
326 No other homozygotes for this mutation were present in our dataset, whereas three of the six  
327 other Isle Royale wolves and two of the Minnesota wolves were heterozygotes. Of the 263  
328 candidate genes we identified in the affected individuals, 10 are associated with the Human  
329 Phenotype Ontology (HPO) term “abnormality of the vertebral column” (HP:0000925), but were  
330 not shared across all five affected individuals. The 10 genes are *ABCC6*, *CAPN1*, *ELN*, *ERCC1*,  
331 *MLXIPL*, *PSAT1*, *TCTN2*, *TERT*, *ENSCAFG00000001588* (ortholog of *SLC52A2*), and  
332 *ENSCAFG00000006532* (ortholog of *DCHS1*) (Fig. S6). Morphogenesis is a complex process,  
333 and the variation in phenotypes within the Isle Royale wolves suggests the involvement of  
334 multiple genes.

335

336 *Testing models for the mechanistic basis of inbreeding depression*

337 We hypothesized that the reason inbreeding depression afflicts Isle Royale wolves, but  
338 not other populations with a long-term history of small population size and isolation, may be due

339 to differences in the prevalence of severely deleterious recessive alleles in the mainland source  
340 population combined with recent inbreeding in Isle Royale. To test this hypothesis, we  
341 conducted simulations in SLiM (Haller and Messer 2016) under a two-population model  
342 incorporating estimates of the long-term effective population sizes of outbred North American  
343 wolves ( $N_e=17,350$ ) and Tibetan wolves ( $N_e=2,500$ ), and the estimated divergence time between  
344 Old and New World wolves of 12,500 years (Fig. 5A) (Fan et al. 2016). We simulated diploid  
345 individuals containing genomes of 1,000 “genes” that accumulated neutral and deleterious  
346 mutations, in order to compare the number of mutations per genome in each population.  
347 Deleterious mutations were categorized as weakly ( $0 < N_e s \leq 10$ ), moderately ( $10 < N_e s \leq 100$ ), and  
348 strongly ( $N_e s > 100$ ) deleterious, where  $N_e$  corresponds to the size of the ancestral population  
349 before the North American and Tibetan populations diverged ( $N_e=45,000$ ). We conducted one  
350 set of simulations in which all mutations were additive ( $h=0.5$ ), and one in which all were  
351 recessive ( $h=0$ ), to explore the effects of dominance. The MWU test was used to evaluate  
352 statistical significance in comparisons between the two populations. Here, the North American  
353 wolf population represents the source population for Isle Royale wolves, which only became  
354 isolated fewer than one hundred years ago, whereas the Tibetan population represents a  
355 population with long-term small effective population size. We predicted that the larger North  
356 American population would contain more strongly deleterious recessive mutations per individual  
357 relative to the Tibetan population. These mutations in particular would severely compromise  
358 fitness in an individual that inherits two copies from a common ancestor through inbreeding.

359 Our simulations confirmed that the total number and the homozygosity of deleterious  
360 alleles per individual vary between the larger North American and the smaller Tibetan  
361 populations. Importantly, different patterns were observed depending upon whether mutations



362 were additive or recessive. In simulations with additive mutations, the overall number of  
363 deleterious alleles per individual was slightly higher (+1.87%) in the smaller Tibetan population  
364 relative to the larger North American population ( $p=1.84 \times 10^{-2}$ ). This difference is due to the  
365 accumulation of moderately deleterious alleles in the Tibetan population (+34%,  $p=2.49 \times 10^{-11}$ ),  
366 as there was no significant difference in the numbers of strongly deleterious or weakly  
367 deleterious additive alleles between the two populations. Thus, in an additive model, selection  
368 against strongly deleterious alleles is not hindered by drift (Fig. 5B), but moderately deleterious  
369 alleles accumulate under stronger drift (Fig. 5C), leading to a slight increase in the overall  
370 number of deleterious alleles in smaller populations.

371         However, in simulations with recessive mutations, a very different pattern emerged.  
372 Here, the overall number of deleterious alleles per individual was higher in the larger North  
373 American population (+3.58%,  $P=1.42 \times 10^{-6}$ ). Although the per-individual number of weakly  
374 deleterious alleles, which make up the vast majority of deleterious mutations (>90%), was  
375 approximately equal in the two populations (Fig. 5D), individuals from the larger North  
376 American population had sharply elevated numbers of strongly (+59.2%,  $P=2.56 \times 10^{-34}$ ) and  
377 moderately (+23.4%,  $P=3.04 \times 10^{-24}$ ) deleterious recessive alleles (Fig. 5B, C) relative to the  
378 smaller Tibetan population. Furthermore, the mean age of segregating strongly deleterious  
379 recessive mutations was 2.22-fold higher in the North American population, compared to a mean  
380 age of 1,199 years in the Tibetan population ( $P=2.56 \times 10^{-34}$ ) (Fig. 5F), indicating that these  
381 mutations persist over longer time periods while they remain hidden from selection as  
382 heterozygotes in the larger population. In contrast, segregating mutations in all other categories  
383 tended to be younger in the North American population (Fig. 5G-I), as a consequence of fewer  
384 new mutations entering the Tibetan population each generation due to its smaller size.

385           In sum, we found that a smaller population, such as Tibetan wolves, has fewer strongly  
386 deleterious recessive alleles, but that these mutations persist in large populations, such as North  
387 American wolves. Inbreeding would therefore produce more individuals homozygous for  
388 strongly deleterious mutations in individuals drawn from a historically large population  
389 compared to individuals drawn from a historically smaller population. Because Isle Royale  
390 wolves were recently founded from a large mainland population of wolves in the Great Lakes  
391 region, and then experienced extensive inbreeding, our simulations suggest they should have  
392 more homozygous strongly deleterious recessive mutations, resulting in increased inbreeding  
393 depression.

394

## 395 **Discussion**

396           The persistence of wolves on Isle Royale was once used to support the claim that a very  
397 small population in isolation may persist, and even thrive, without succumbing to genetic  
398 deterioration (Mech and Cronin 2010). During the past few decades, however, Isle Royale  
399 wolves have experienced a precipitous decline following generations of inbreeding and physical  
400 degeneration (Räikkönen et al. 2009; Hedrick et al. 2014). Although inbreeding depression was  
401 not the sole determinant, it has undoubtedly played a role in the collapse of the population, along  
402 with stochastic demographic and environmental events, such as periodic disease outbreaks,  
403 severe winters, and the drowning of three wolves in a flooded abandoned mine shaft in 2011  
404 (Hedrick et al. 2014). The genomes of Isle Royale wolves bear the hallmarks of their extreme  
405 demographic history, characterized by extensive ROH, in some cases spanning whole  
406 chromosomes, leading to a marked increase in the homozygosity of deleterious variants.

407           Notably, wolves from other populations with more homozygous genomes, but with  
408 shorter ROH, are not known to be afflicted by inbreeding depression. The absence of inbreeding  
409 in Tibetan and Ethiopian wolves is not definitive, however, and future research is needed to  
410 determine whether low genetic diversity and high homozygosity of deleterious variants in these  
411 populations is associated with abnormal phenotypes. Nonetheless, our simulations affirm that  
412 purging of strongly deleterious recessive alleles may occur in populations of moderate size and  
413 low heterozygosity, despite increases in the overall burden of deleterious variants due to the  
414 accumulation of weakly deleterious alleles. Currently, calculating the burden of strongly  
415 deleterious recessive alleles within a genome is challenging, particularly in non-model species.  
416 In humans, it has been estimated that each diploid genome carries ~1-2 recessive lethal  
417 mutations, but the number of recessive sub-lethal mutations that compromise fitness is likely to  
418 be much higher (Gao et al. 2015). Thus, the risk of inbreeding depression is higher for genomes  
419 recently originating from a historically large population, such as Isle Royale wolves, as they  
420 carry a greater burden of strongly deleterious recessive mutations. These strongly deleterious  
421 recessive mutations are carried as heterozygotes within the founders, but quickly become  
422 homozygous in the island population through inbreeding, resulting in inbreeding depression.  
423 Similar phenomena have been noted in maize, which were domesticated from historically large  
424 populations, presumably carrying many recessive deleterious alleles in the heterozygous state.  
425 Here the initial inbred lines exhibited severe inbreeding depression and reduced yield, creating  
426 the need for hybrid lines (Troyer 2006).

427           Our analysis of Isle Royale wolf genomes contrasts with an increasing number of studies  
428 showing an elevated burden of deleterious variants along with reduced genetic diversity in  
429 historically small or bottlenecked populations (eg. Lohmueller et al. 2008; Renaut and Rieseberg

430 2015; Marsden et al. 2016). We found no difference in the number of derived deleterious alleles  
431 in Isle Royale compared to the mainland Minnesota population, suggesting that the additive  
432 genetic load may be the same in both populations. Instead, the reduction in fitness on Isle Royale  
433 is due to the increased homozygosity of recessive mutations. Alternatively, the additive genetic  
434 load may be higher in the Isle Royale population, but we are unable to detect this increased load  
435 due to the difficulties of determining which amino acid changing variants are deleterious. In  
436 either scenario, our findings suggest that populations with a similar number of derived  
437 deleterious alleles and heterozygosity may still differ in their genetic load, and additional metrics  
438 should be used to quantify the load in populations.

439         Increased homozygosity due to severe inbreeding in Isle Royale wolves has resulted in  
440 significant morphologic defects, especially malformed vertebrae that are associated with adverse  
441 clinical symptoms in dogs. Other abnormalities have also been observed in Isle Royale wolves,  
442 including syndactyly, probable cataracts, an unusual “rope tail”, and anomalous fur phenotypes  
443 (Räikkönen et al. 2009, Peterson and Vucetich 2015). Hedrick et al. (2014) found that highly  
444 inbred wolves had low survival and reproduction relative to less inbred wolves in Isle Royale.  
445 The individual with the highest pedigree-based inbreeding coefficient and the highest  
446 homozygosity among our sequenced Isle Royale wolves, M141 ( $F_{PED}=0.375$ ,  $F_{ROH}=0.47$ ), lived  
447 only two years and did not reproduce (Hedrick et al. 2014). Another wolf, F75 ( $F_{PED}=0.25$ ,  
448  $F_{ROH}=0.42$ ), died at four years of age while giving birth to a litter of pups presumably sired by  
449 her own father (Hedrick et al. 2014). The pedigree-based inbreeding coefficient of this litter, in  
450 which all pups showed vertebral changes and all but one possessed extra ribs, was 0.375  
451 (Hedrick et al. 2014). Reproduction within the population ceased after 2014, and it has fallen  
452 from 30 individuals to only two over the past twelve years (Peterson and Vucetich 2017). The

453 population of moose on Isle Royale, the main prey of Isle Royale wolves, has swelled from 450  
454 to 1600 individuals over the same period (Peterson and Vucetich 2017). Thus the demise of  
455 wolves on Isle Royale cannot be attributed to lack of available prey.

456         The collapse of the Isle Royale wolf population occurred despite a reported genetic  
457 rescue and evidence of earlier sporadic migration events from the mainland. Previous genetic  
458 analysis revealed that undetected migration from the mainland may have occurred in years when  
459 the winter was cold enough for an ice bridge to form (Adams et al. 2011; Hedrick et al. 2014).  
460 However, warmer winters over the past several decades have resulted in a dramatic reduction in  
461 the formation of ice bridges, a trend that is likely to continue in a warming climate (Hedrick et al.  
462 2014). The reported genetic rescue of the Isle Royale wolf population by a single migrant from  
463 the mainland in 1997 also appears to have been short-lived (Hedrick et al 2014). This male wolf  
464 was such a successful breeder that his genome effectively swamped the population, leading to  
465 intense inbreeding in his descendants within two generations (Fig. 1A). A similar episode  
466 occurred in the inbred Scandinavian wolf population following the arrival of an immigrant wolf  
467 in 1991, but the population has entered a period of growth following subsequent additional  
468 immigration events (Åkesson et al. 2016). A higher rate of gene flow between the mainland and  
469 the island after the Isle Royale population was established may have mitigated or postponed  
470 inbreeding depression, but the effective rate of naturally-occurring gene flow was clearly  
471 insufficient. Sustained human-assisted gene flow may therefore be the only option for the  
472 persistence of wolves on Isle Royale.

473         A potential alternative strategy to reduce the risk of inbreeding depression following  
474 reintroduction would be to select founders from a historically small population, where purging of  
475 strongly deleterious alleles may have already occurred. Such individuals may be effectively pre-

476 adapted to withstand small population size, bottlenecks, and inbreeding. This strategy must be  
477 considered carefully, however, since its success requires the absence of gene flow with large  
478 populations nearby that would introduce strongly deleterious recessive alleles back into the  
479 smaller population. Given the intermittent migration that occurs with the mainland, selecting  
480 founder individuals from historically small populations would not be a viable strategy for Isle  
481 Royale wolf reintroduction. Nonetheless, the idea that founders from historically isolated  
482 populations should be selected in order to mitigate the risk of inbreeding depression is novel, but  
483 may be an approach to enhance long-term persistence of the inevitably small and isolated  
484 populations of many species in the future.

485         Finally, life history traits must be considered when determining the best course of action  
486 to reduce the risk of inbreeding. For example, wolves, including those on Isle Royale, typically  
487 avoid mating with close relatives through the exchange of individuals between different packs,  
488 which are usually familial units that consist of a breeding pair and its offspring (Geffen et al.  
489 2011). Previously, Isle Royale sustained 3-4 wolf packs, hence the estimate that the long-term  
490 effective population size of wolves on Isle Royale was a mere 3.8 individuals (Peterson et al.  
491 1998). In simulations under models incorporating ecological and demographic stochasticity, the  
492 mean time to extinction for social organisms, specifically wolves, is strongly tied to the number  
493 of social groups rather than the number of individuals (Vucetich et al. 1997). Thus, a minimum  
494 number of wolves to sustain multiple packs, and therefore maximize the number of breeding  
495 individuals is essential for population persistence.

496         A vigorous ongoing discussion concerns the restoration of a healthy wolf population on  
497 Isle Royale by introducing wolves from the mainland (Vucetich et al. 2016). In the absence of  
498 recurring immigration, whether managed or not, the fate of a restored population is grim, given

499 the inevitability of inbreeding on Isle Royale and its proven detrimental outcome. On the other  
500 hand, wolf predation is an important top-down influence on Isle Royale, and its absence  
501 threatens the stability of the island ecosystem (Peterson et al. 2014). The collapse of the Isle  
502 Royale wolf population demonstrates the critical importance of maintaining effective population  
503 sizes large enough to allow selection to remove strongly deleterious variants. Although it is too  
504 late to resurrect a population from the lone remaining pair of wolves on Isle Royale, we show  
505 that the demise of this iconic population provides new lessons for a potential reintroduction, as  
506 well as guidance for the management of other species or populations to minimize the risk of  
507 inbreeding depression.

508

## 509 **Materials and Methods**

### 510 *Samples and sequencing*

511 DNA from Isle Royale wolves was extracted from blood samples archived at Michigan  
512 Technological University. DNA samples with high quality and high molecular weight were  
513 selected for sequencing. DNA from Minnesota and Canadian Arctic wolves was extracted from  
514 blood and tissue samples from the archive of Dr. Robert Wayne that were used in previous  
515 studies (vonHoldt et al. 2011, Schweizer et al. 2016). Whole genome sequencing was performed  
516 on an Illumina HiSeq4000 at the Vincent J. Coates Genomics Sequencing Laboratory at UC  
517 Berkeley. Previously sequenced genomes with high coverage were downloaded from the NCBI  
518 Short Read Archive (see Table S1).

519

### 520 *Read processing and alignment*

521 A pipeline adapted from the Genome Analysis Toolkit (GATK, McKenna et al. 2010)  
522 Best Practices Guide was used to process raw reads prior to genotype calling. Briefly, paired end  
523 raw sequence reads, 150 bases in length, were aligned to the domestic dog reference genome,  
524 canFam3.1, using bwa MEM (Li 2013), before removal of PCR duplicates and low quality reads.  
525 Lacking a database of known variants, the bootstrapping method of base quality score  
526 recalibration as recommended by GATK was performed by calling raw genotypes with GATK  
527 UnifiedGenotyper (minimum base quality Phred score 20), and using these variants as input for  
528 recalibration with BaseRecalibrator. This process was repeated three times to reach convergence  
529 between reported and empirical quality scores.

530

#### 531 *Genotype calling and filtering*

532 Joint genotype calling was performed with GATK HaplotypeCaller. Genotypes were  
533 filtered for quality and depth, leaving only high quality biallelic single nucleotide  
534 polymorphisms. Only genotypes with at least six supporting reads and high quality (minimum  
535 Phred score of 20) were included. An excess depth filter, set at the 99<sup>th</sup> percentile of depth for  
536 each sample, was also used. Variant sites were then filtered on the following criteria: sites failing  
537 the recommended GATK hard filters were excluded, as well as sites with excess depth (>99<sup>th</sup>  
538 percentile for total depth across all samples), low Phred score (QUAL<30), more than 20%  
539 missing data, excess heterozygosity (>50% of individuals heterozygous), or sites found within  
540 repeat regions and CpG islands (coordinates from Marsden et al. 2016).

541

#### 542 *Variant annotation*



543 Variant sites were annotated with the Ensembl VEP (version 87) with SIFT enabled  
544 (Kumar et al. 2009; McLaren et al. 2010). SIFT determines whether a nonsynonymous mutation  
545 is likely to be damaging or benign on the basis of phylogenetic constraint on an amino acid  
546 within a protein alignment. We grouped variants in protein-coding regions into “damaging” and  
547 “benign” classes. Damaging variants included nonsynonymous variants classified as  
548 “deleterious” by SIFT (score  $<0.05$ ) and variants that disrupted splice sites, start codons, or stop  
549 codons. Benign variants included nonsynonymous variants classified as “tolerated” by SIFT  
550 (score  $\geq 0.05$ ) and synonymous mutations. Alleles were polarized as derived or ancestral with  
551 respect to the gray fox and African golden wolf genomes.

552

### 553 *Phylogenetic analysis and cladogram construction*

554 A cladogram representing the relationships between 20 genomes in this study was  
555 constructed using SNPhylo (Lee et al. 2014). Where multiple individuals were available from a  
556 single population, one individual was chosen at random for inclusion in the tree (Minnesota:  
557 RKW119, Isle Royale: CL141, Yellowstone: 569F). SNPs were pruned for linkage  
558 disequilibrium (threshold of 0.2), and SNPs with minor allele frequency  $<0.1$  or with  
559 missingness above 10% were excluded. The tree was constructed with the 28,651 remaining  
560 SNPs. 1,000 bootstrap replicates were performed.

561

### 562 *Morphological analysis*

563 Skeletons from six of the eleven Isle Royale wolves included in this study were retrieved  
564 from storage at Michigan Technological University, photographed, and assessed for  
565 morphological anomalies as described in Rääkkönen et al. 2006, 2009. Skeletons were obtained

566 from carcasses collected post mortem. The vertebral column and rib variation was evaluated. In  
567 some cases, specimens were missing a few vertebrae or ribs; the list of examined wolves is noted  
568 in Table 1. A litter of eight newborn pups from F75 was also examined through radiographic  
569 analysis.

570

#### 571 *Calculation of genome-wide heterozygosity*

572 In this study, we calculated heterozygosity as the number of heterozygous genotypes  
573 divided by the total number of called genotypes within a single individual. For each individual,  
574 we calculated heterozygosity for the entire autosomal genome, as well as in non-overlapping 1-  
575 Mb windows across the autosomes. Windows where more than 80% of sites failing filters or  
576 missing were excluded.

577

#### 578 *Identification and analysis of ROH*

579 ROH were identified using VCFtools (Danecek et al. 2011). ROH spanning regions with  
580 fewer than 50 variant sites were excluded. The amount of protein-coding sequence within ROH  
581 was determined by calculating the overlap between the coordinates of ROH within each  
582 individual and the coordinates of protein-coding exons download from Ensembl Biomart  
583 (version 87). To test for enrichment of homozygous deleterious variants within ROH, we  
584 followed the method of Szpiech et al. 2013. The fraction of the genome within ROH and the  
585 fraction of damaging and benign homozygous genotypes inside ROH was calculated in each  
586 individual. Following Equation 10 of Szpiech et al. 2013, we fit linear models to test whether  
587 variant impact (benign versus deleterious) and  $F_{\text{ROH}}$  were significant predictors ( $\beta_2$  and  $\beta_3$ ,  
588 respectively) for the proportion of nonreference homozygotes within ROH.

589

590 *Identification of candidate genes underlying Isle Royale phenotypes*

591 Candidate mutations underlying the abnormal phenotypes observed within our sample of  
592 Isle Royale wolves satisfying the following criteria were identified. Mutations had to be  
593 classified as damaging (missense mutations classified as deleterious by SIFT as well as  
594 mutations disrupting splice sites or start/stop codons) and passing all quality control filters  
595 described above. Mutations had to be homozygous and contained within ROH of 100 kb or more  
596 in the affected wolves (F65, F75, M152, M175, F189), but not homozygous for the derived allele  
597 in the unaffected wolf (M61). Finally, only mutations with low frequency (<10%) in 21 other  
598 gray wolves (wolves from Minnesota (6), Canadian arctic (4), Yellowstone (3), Quebec, Mexico,  
599 Portugal, Spain, Italy, Iran, Tibet, Xinjiang) were considered. Alleles were polarized as ancestral  
600 or derived with respect to the gray fox and African wolf outgroups. Genes containing mutations  
601 satisfying all criteria were extracted and associated with HPO terms (2017-10-05 release) using  
602 gProfileR (r1741\_e90\_eg37 release, Reimand et al. 2011).

603

604 *Simulations of neutral and deleterious variation*

605 Simulations were carried out in SLiM (version 2.4.2, Haller and Messer 2016) under a  
606 divergence model with parameters estimated by Fan et al. (2016). Each simulated individual  
607 consisted of a diploid 1 Mb genome, with a simple architecture of 1,000 “genes” carried on 38  
608 chromosomes proportional to chromosome lengths in the dog genome. Each gene consisted of a  
609 contiguous 1 kb sequence that accumulated mutations at a rate of  $1 \times 10^{-8}$  per site per generation.  
610 Selection coefficients for deleterious mutations were drawn from the distribution of fitness  
611 effects inferred from a large sample of humans by Kim et al. (2017). 70% of mutations were

612 deleterious, and the remaining 30% were neutral ( $s=0$ ). Each simulation began with a burn-in  
613 period of 450,000 ( $10 \times N_e$ ) generations to allow the ancestral population to reach equilibrium.  
614 Recombination was permitted at single base positions between each gene at a rate of  $1 \times 10^{-3}$  per  
615 site per generation, to simulate the effective rate of crossing over that would occur in 100 kb  
616 noncoding regions between each gene. At the end of each simulation, the average number of  
617 alleles per individual and the average age of segregating mutations were calculated for weakly  
618 ( $0 < N_e s \leq 10$ ), moderately ( $10 < N_e s \leq 100$ ), strongly ( $N_e s > 100$ ) deleterious, and neutral mutations  
619 ( $N_e s = 0$ ). We performed 100 replicates in which mutations were additive ( $h=0.5$ ) and 100  
620 replicates in which mutations were completely recessive ( $h=0.0$ ), to examine the effects of  
621 dominance.

622  
623 **Acknowledgements:** We thank Philip W. Hedrick for helpful discussions in preparation of this  
624 manuscript. This work used the Vincent J. Coates Genomics Sequencing Laboratory at UC  
625 Berkeley, supported by NIH S10 OD018174 Instrumentation Grant. This work was funded  
626 by National Institute of Health grant R35GM119856 to KEL, U.S. National Science Foundation  
627 DEB-1453041 to JAV, Isle Royale National Park (CESU Task Agreement No.  
628 P16AC00004, under Master Cooperative Agreement Number P12AC31164), the Robbins Chair  
629 in Sustainable Management of the Environment to ROP at Michigan Technological University,  
630 McIntyre-Stennis Grant USDA-Nifa-1014575.

631  
632 **Author Contributions:** The study was conceived of and designed by JAR, KEL, RKW, and  
633 ROP. Sample acquisition was performed by LMV, JAV, and ROP. Morphological analyses were  
634 carried out by JR. Genomic analyses and simulations were carried out by JAR. Manuscript was

635 written by JAR. All authors contributed to manuscript revision and approved the final version.

636 RKW and KEL jointly supervised this work.

637

638 **Competing Interests:** The authors declare that they have no competing interests.

639

640 **Data and Materials Availability:** Newly generated genome sequence data were deposited in the

641 NCBI Short Read Archive under BioProject PRJNAXXXXXX. The authors acknowledge

642 Nathan C. Nelson from Michigan State University for providing radiographs of the wolf pups.

643

#### 644 **Bibliography**

645

646 Adams, J.R., Vucetich, L.M., Hedrick, P.W., Peterson, R.O. and Vucetich, J.A., 2011. Genomic  
647 sweep and potential genetic rescue during limiting environmental conditions in an  
648 isolated wolf population. *Proceedings of the Royal Society B*, 278(1723), 3336-3344.

649

650 Åkesson, M., Liberg, O., Sand, H., Wabakken, P., Bensch, S. and Flagstad, Ø., 2016. Genetic  
651 rescue in a severely inbred wolf population. *Molecular Ecology*, 25(19), 4745-4756.

652

653 Allen, D. L., and L. D. Mech. 1963. Wolves versus moose on Isle Royale. *National Geographic*  
654 123(2), 200-219.

655

656 Carmichael, L.E., Krizan, J., Nagy, J.A., Dumond, M., Johnson, D., Veitch, A. and Strobeck, C.,  
657 2008. Northwest passages: conservation genetics of Arctic Island wolves. *Conservation*  
658 *Genetics*, 9(4), 879-892.

659

660 Carmichael, L.E., Krizan, J., Nagy, J.A., Fuglei, E., Dumond, M., Johnson, D., Veitch, A.,  
661 Berteaux, D. and Strobeck, C., 2007. Historical and ecological determinants of genetic  
662 structure in arctic canids. *Molecular Ecology*, 16(16), 3466-3483.

663

664 Ceballos, G. and Ehrlich, P.R., 2002. Mammal population losses and the extinction crisis.  
665 *Science*, 296(5569), 904-907.

666

667 Charlesworth, D. and Willis, J.H., 2009. The genetics of inbreeding depression. *Nature Reviews*  
668 *Genetics*, 10(11), 783.

669

- 670 Damur-Djuric, N., Steffen, F., Hässig, M., Morgan, J.P., and Flückiger, M.A., 2006.  
671 Lumbosacral transitional vertebrae in dogs: classification, prevalence, and association  
672 with sacroiliac morphology. *Veterinary Radiology & Ultrasound*, 47(1), 32-38.  
673
- 674 Danecek, P., Auton, A., Abecasis, G., Albers, C.A., Banks, E., DePristo, M.A., Handsaker, R.E.,  
675 Lunter, G., Marth, G.T., Sherry, S.T., McVean, G., Durbin, R. and 1000 Genomes Project  
676 Analysis Group, 2011. The variant call format and VCFtools. *Bioinformatics*, 27(15),  
677 2156-2158.  
678
- 679 Fabbri, E., Miquel, C., Lucchini, V., Santini, A., Caniglia, R., Duchamp, C., Weber, J., Lequette,  
680 B., Marucco, F., Boitani, L., Fumagalli, L., Taberlet, P. and Randi, E., 2007. From the  
681 Apennines to the Alps: colonization genetics of the naturally expanding Italian wolf  
682 (*Canis lupus*) population. *Molecular Ecology*, 16(8), 1661-1671.  
683
- 684 Faisst, A.M., Alvarez-Bolado, G., Treichel, D. and Gruss, P., 2002. Rotatin is a novel gene  
685 required for axial rotation and left-right specification in mouse embryos. *Mechanisms of*  
686 *Development*, 113(1), 15-28.  
687
- 688 Fan, Z., Silva, P., Gronau, I., Wang, S., Armero, A.S., Schweizer, R.M., Ramirez, O., Pollinger,  
689 J., Galaverni, M., Ortega Del-Vecchyo, D., Du, L., Zhang, W., Zhang, Z., Xing, J., Vilà,  
690 C., Marques-Bonet, T., Godinho, R., Yue, B. and Wayne, R.K., 2016. Worldwide  
691 patterns of genomic variation and admixture in gray wolves. *Genome Research*, 26(2),  
692 163-173.  
693
- 694 Flückiger, M.A., Damur-Djuric, N., Hässig, M., Morgan, J.P., and Steffen F., 2006. A  
695 lumbosacral transitional vertebra in the dog predisposes to cauda equina  
696 syndrome. *Veterinary Radiology & Ultrasound*, 47(1), 39-44.  
697
- 698 Flückiger, M.A., Steffen, F., Hässig, M. and Morgan, J.P., 2017. Asymmetrical lumbosacral  
699 transitional vertebrae in dogs may promote asymmetrical hip joint  
700 development. *Veterinary and Comparative Orthopaedics and Traumatology*, 30(02),  
701 137-142.  
702
- 703 Fredrickson, R.J., Siminski, P., Woolf, M. and Hedrick, P.W., 2007. Genetic rescue and  
704 inbreeding depression in Mexican wolves. *Proceedings of the Royal Society of London B:*  
705 *Biological Sciences*, 274(1623), 2365-2371.  
706
- 707 Gao, Z., Waggoner, D., Stephens, M., Ober, C. and Przeworski, M., 2015. An estimate of the  
708 average number of recessive lethal mutations carried by humans. *Genetics*, 199(4), 1243-  
709 1254.  
710
- 711 Geffen, E., Kam, M., Hefner, R., Hersteinsson, P., Angerbjörn, A., Dalèn, L., Fuglei, E., Norèn,  
712 K., Adams, J.R., Vucetich, J., Meier, T.J., Mech, L.D., vonHoldt, B.M., Stahler, D.R. and  
713 Wayne, R.K., 2011. Kin encounter rate and inbreeding avoidance in canids. *Molecular*  
714 *Ecology*, 20(24), 5348-5358.  
715

- 716 Gottelli, D., Marino, J., Sillero-Zubiri, C., and Funk, S.M., 2004. The effect of the last glacial  
717 age on speciation and population genetic structure of the endangered Ethiopian wolf  
718 (*Canis simensis*). *Molecular Ecology*, 13(8), 2275-2286.  
719
- 720 Gottelli, D., Sillero-Zubiri, C., Applebaum, G.D., Roy, M.S., Girman, D.J., Garcia - Moreno, J.,  
721 Ostrander, E.A. and Wayne, R.K., 1994. Molecular genetics of the most endangered  
722 canid: the Ethiopian wolf *Canis simensis*. *Molecular Ecology*, 3(4), 301-312.  
723
- 724 Gray, M.M., Granka, J.M., Bustamante, C.D., Sutter, N.B., Boyko, A.R., Zhu, L., Ostrander,  
725 E.A. and Wayne, R.K., 2009. Linkage disequilibrium and demographic history of wild  
726 and domestic canids. *Genetics*, 181(4), 1493-1505.  
727
- 728 Haller, B.C. and Messer, P.W., 2016. SLiM 2: flexible, interactive forward genetic simulations.  
729 *Molecular Biology and Evolution*, 34(1), 230-240.  
730
- 731 Hedrick, P.W. and Garcia-Dorado, A., 2016. Understanding inbreeding depression, purging, and  
732 genetic rescue. *Trends in Ecology & Evolution*, 31(12), 940-952.  
733
- 734 Hedrick, P.W., Kardos, M., Peterson, R.O. and Vucetich, J.A., 2016. Genomic Variation of  
735 Inbreeding and Ancestry in the Remaining Two Isle Royale Wolves. *Journal of Heredity*,  
736 108(2), 120-126.  
737
- 738 Hedrick, P.W., Miller, P.S., Geffen, E. and Wayne, R., 1997. Genetic evaluation of the three  
739 captive Mexican wolf lineages. *Zoo Biology*, 16(1), 47-69.  
740
- 741 Hedrick, P.W., Peterson, R.O., Vucetich, L.M., Adams, J.R. and Vucetich, J.A., 2014. Genetic  
742 rescue in Isle Royale wolves: genetic analysis and the collapse of the population.  
743 *Conservation Genetics*, 15(5), 1111-1121.  
744
- 745 Keller, L.F. and Waller, D.M., 2002. Inbreeding effects in wild populations. *Trends in Ecology*  
746 *& Evolution*, 17(5), 230-241.  
747
- 748 Kim, B.Y., Huber, C.D. and Lohmueller, K.E., 2017. Inference of the distribution of selection  
749 coefficients for new nonsynonymous mutations using large samples. *Genetics*, 206(1),  
750 345-361.  
751
- 752 Koepfli, K.P., Pollinger, J., Godinho, R., Robinson, J., Lea, A., Hendricks, S., Schweizer, R.M.,  
753 Thalmann, O., Silva, P., Fan, Z. and Yurchenko, A.A., Dobrynin, P., Makunin, A., Cahill,  
754 J.A., Shapiro, B., Álvares, F., Brito, J.C., Geffen, E., Leonard, J.A., Helgen, K.M.,  
755 Johnson, W.E., O'Brien, S.J., Van Valkenburgh, B. and Wayne, R.K., 2015. Genome-  
756 wide evidence reveals that African and Eurasian golden jackals are distinct species.  
757 *Current Biology*, 25(16), 2158-2165.  
758
- 759 Kranenburg, H.J.C., Voorhout, G., Grinwis, G.C., Hazewinkel, H.A. and Meij, B.P., 2011.  
760 Diffuse idiopathic skeletal hyperostosis (DISH) and spondylosis deformans in purebred  
761 dogs: a retrospective radiographic study. *The Veterinary Journal*, 190(2), e84-e90.

- 762  
763 Kumar, P., Henikoff, S. and Ng, P.C., 2009. Predicting the effects of coding non-synonymous  
764 variants on protein function using the SIFT algorithm. *Nature Protocols*, 4(7), 1073-  
765 1081.  
766  
767 Laikre, L. and Ryman, N., 1991. Inbreeding depression in a captive wolf (*Canis lupus*)  
768 population. *Conservation Biology*, 5(1), 33-40.  
769  
770 Laikre, L., Ryman, N. and Thompson, E.A., 1993. Hereditary blindness in a captive wolf (*Canis*  
771 *lupus*) population: frequency reduction of a deleterious allele in relation to gene  
772 conservation. *Conservation Biology*, 7(3), 592-601.  
773  
774 Larsen, J.S. & Selby, L.A., 1981. Spondylosis deformans in large dogs: relative risk by breed,  
775 age and sex. *Journal of the American Animal Hospital Association*, 17, 623–625.  
776  
777 Lee, T.H., Guo, H., Wang, X., Kim, C. and Paterson, A.H., 2014. SNPhylo: a pipeline to  
778 construct a phylogenetic tree from huge SNP data. *BMC Genomics*, 15(1), 162.  
779  
780 Li, H., 2013. Aligning sequence reads, clone sequences and assembly contigs with BWA-MEM.  
781 *arXiv preprint arXiv:1303.3997*.  
782  
783 Liberg, O., Andrén, H., Pedersen, H.C., Sand, H., Sejberg, D., Wabakken, P., Åkesson, M. and  
784 Bensch, S., 2005. Severe inbreeding depression in a wild wolf *Canis lupus* population.  
785 *Biology Letters*, 1(1), 17-20.  
786  
787 Lohmueller, K.E., Indap, A.R., Schmidt, S., Boyko, A.R., Hernandez, R.D., Hubisz, M.J.,  
788 Sninsky, J.J., White, T.J., Sunyaev, S.R., Nielsen, R. and Clark, A.G., 2008.  
789 Proportionally more deleterious genetic variation in European than in African  
790 populations. *Nature*, 451(7181), 994.  
791  
792 Lucchini, V., Galov, A. and Randi, E., 2004. Evidence of genetic distinction and long-term  
793 population decline in wolves (*Canis lupus*) in the Italian Apennines. *Molecular Ecology*,  
794 13(3), 523-536.  
795  
796 Marsden, C.D., Ortega-Del Vecchyo, D., O'Brien, D.P., Taylor, J.F., Ramirez, O., Vilà, C.,  
797 Marques-Bonet, T., Schnabel, R.D., Wayne, R.K. and Lohmueller, K.E., 2016.  
798 Bottlenecks and selective sweeps during domestication have increased deleterious genetic  
799 variation in dogs. *Proceedings of the National Academy of Sciences*, 113(1), 152-157.  
800  
801 McKenna, A., Hanna, M., Banks, E., Sivachenko, A., Cibulskis, K., Kernysky, A., Garimella,  
802 K., Altshuler, D., Gabriel, S., Daly, M. and DePristo, M.A., 2010. The Genome Analysis  
803 Toolkit: a MapReduce framework for analyzing next-generation DNA sequencing data.  
804 *Genome Research*, 20(9), 1297-1303.  
805



- 806 McLaren, W., Pritchard, B., Rios, D., Chen, Y., Flicek, P. and Cunningham, F., 2010. Deriving  
807 the consequences of genomic variants with the Ensembl API and SNP Effect Predictor.  
808 *Bioinformatics*, 26(16), 2069-2070.  
809
- 810 Mech, D. and Cronin, M.A., 2010. Isle Royale study affirms ability of wolves to persist.  
811 *Biological Conservation*, 143(3), 535-536.  
812
- 813 Morgan, J.P., Bahr, A., Franti, C.E. and Bailey, C.S., 1993. Lumbosacral transitional vertebrae as  
814 a predisposing cause of cauda equina syndrome in German shepherd dogs: 161 cases  
815 (1987-1990). *Journal of the American Veterinary Medical Association*, 202(11), 1877-  
816 1882.  
817
- 818 Morgan, J.P., Hansson, K. and Miyabayashi, T., 1989. Spondylosis deformans in the female  
819 beagle dog: A radiographic study. *Journal of Small Animal Practice*, 30(8), 457-460.  
820
- 821 Musiani, M., Leonard, J.A., Cluff, H., Gates, C.C., Mariani, S., Paquet, P.C., Vilà, C. and  
822 Wayne, R.K., 2007. Differentiation of tundra/taiga and boreal coniferous forest wolves:  
823 genetics, coat colour and association with migratory caribou. *Molecular Ecology*, 16(19),  
824 4149-4170.  
825
- 826 Peischl, S. and Excoffier, L., 2015. Expansion load: recessive mutations and the role of standing  
827 genetic variation. *Molecular Ecology*, 24(9), 2084-2094.  
828
- 829 Peterson, R.O. and Vucetich, J.A., 2015. Ecological Studies of Wolves on Isle Royale, Annual  
830 Report 2014-2015. 8 April 2015.  
831 [https://www.isleroyalewolf.org/sites/default/files/annual-report-](https://www.isleroyalewolf.org/sites/default/files/annual-report-pdf/Annual%20Report%202015-for%20web.pdf)  
832 [pdf/Annual%20Report%202015-for%20web.pdf](https://www.isleroyalewolf.org/sites/default/files/annual-report-pdf/Annual%20Report%202015-for%20web.pdf).  
833
- 834 Peterson, R.O. and Vucetich, J.A., 2017. Ecological Studies of Wolves on Isle Royale, Annual  
835 Report 2016-2017. 31 March 2017.  
836 [https://www.isleroyalewolf.org/sites/default/files/annual-report-](https://www.isleroyalewolf.org/sites/default/files/annual-report-pdf/Annual%20Report%202016-2017_0.pdf)  
837 [pdf/Annual%20Report%202016-2017\\_0.pdf](https://www.isleroyalewolf.org/sites/default/files/annual-report-pdf/Annual%20Report%202016-2017_0.pdf).  
838
- 839 Peterson, R.O., Thomas, N.J., Thurber, J.M., Vucetich, J.A. and Waite, T.A., 1998. Population  
840 limitation and the wolves of Isle Royale. *Journal of Mammalogy*, 79(3), 828-841.  
841
- 842 Peterson, R.O., Vucetich, J.A., Bump, J.M. and Smith, D.W., 2014. Trophic cascades in a  
843 multicausal world: Isle Royale and Yellowstone. *Annual Review of Ecology, Evolution,*  
844 *and Systematics*, 45, 325-345.  
845
- 846 Räikkönen, J., Bignert, A., Mortensen, P. and Fernholm, B., 2006. Congenital defects in a highly  
847 inbred wild wolf population (*Canis lupus*). *Mammalian Biology-Zeitschrift für*  
848 *Säugetierkunde*, 71(2), 65-73.  
849

- 850 Räikkönen, J., Vucetich, J.A., Peterson, R.O. and Nelson, M.P., 2009. Congenital bone  
851 deformities and the inbred wolves (*Canis lupus*) of Isle Royale. *Biological Conservation*,  
852 142(5), 1025-1031.  
853
- 854 Räikkönen, J., Vucetich, J.A., Vucetich, L.M., Peterson, R.O. and Nelson, M.P., 2013. What the  
855 inbred Scandinavian wolf population tells us about the nature of conservation. *PloS ONE*,  
856 8(6), e67218.  
857
- 858 Ramirez, O., Altet, L., Enseñat, C., Vilà, C., Sanchez, A. and Ruiz, A., 2006. Genetic assessment  
859 of the Iberian wolf *Canis lupus signatus* captive breeding program. *Conservation*  
860 *Genetics*, 7(6), 861-878.  
861
- 862 Randall, D.A., Pollinger, J.P., Wayne, R.K., Tallents, L.A., Johnson, P.J. and Macdonald, D.W.,  
863 2007. Inbreeding is reduced by female-biased dispersal and mating behavior in Ethiopian  
864 wolves. *Behavioral Ecology*, 18(3), 579-589.  
865
- 866 Reimand, J., Arak, T. and Vilo, J., 2011. g: Profiler—a web server for functional interpretation  
867 of gene lists (2011 update). *Nucleic Acids Research*, 39, W307-W315.  
868
- 869 Renaut, S. and Rieseberg, L.H., 2015. The accumulation of deleterious mutations as a  
870 consequence of domestication and improvement in sunflowers and other *Compositae*  
871 crops. *Molecular Biology and Evolution*, 32(9), 2273-2283.  
872
- 873 Ripple, W.J., Estes, J.A., Beschta, R.L., Wilmers, C.C., Ritchie, E.G., Hebblewhite, M., Berger,  
874 J., Elmhagen, B., Letnic, M., Nelson, M.P., Schmitz, O.J., Smith, D.W., Wallach, A.D.  
875 and Wirsing, A.J., 2014. Status and ecological effects of the world's largest  
876 carnivores. *Science*, 343(6167), 1241484.  
877
- 878 Robinson, J.A., Ortega-Del Vecchyo, D., Fan, Z., Kim, B.Y., Marsden, C.D., Lohmueller, K.E.  
879 and Wayne, R.K., 2016. Genomic flatlining in the endangered island fox. *Current*  
880 *Biology*, 26(9), 1183-1189.  
881
- 882 Roelke, M.E., Martenson, J.S. and O'Brien, S.J., 1993. The consequences of demographic  
883 reduction and genetic depletion in the endangered Florida panther. *Current Biology*, 3(6),  
884 340-350.  
885
- 886 Roy, M.S., Geffen, E., Smith, D., Ostrander, E.A. and Wayne, R.K., 1994. Patterns of  
887 differentiation and hybridization in North American wolflike canids, revealed by analysis  
888 of microsatellite loci. *Molecular Biology and Evolution*, 11(4), 553-570.  
889
- 890 Sastre, N., Vila, C., Salinas, M., Bologov, V.V., Urios, V., Sánchez, A., Francino, O. and  
891 Ramírez, O., 2011. Signatures of demographic bottlenecks in European wolf populations.  
892 *Conservation Genetics*, 12(3), 701-712.  
893

- 894 Schweizer, R.M., vonHoldt, B.M., Harrigan, R., Knowles, J.C., Musiani, M., Coltman, D.,  
895 Novembre, J. and Wayne, R.K., 2016. Genetic subdivision and candidate genes under  
896 selection in North American grey wolves. *Molecular Ecology*, 25(1), 380-402.  
897
- 898 Sheffield, V.C., Stone, E.M. and Carmi, R., 1998. Use of isolated inbred human populations for  
899 identification of disease genes. *Trends in Genetics*, 14(10), 391-396.  
900
- 901 Sillero-Zubiri, C., Gottelli, D. and Macdonald, D.W., 1996. Male philopatry, extra-pack  
902 copulations and inbreeding avoidance in Ethiopian wolves (*Canis simensis*). *Behavioral*  
903 *Ecology and Sociobiology*, 38(5), 331-340.  
904
- 905 Sutter, N.B. and Ostrander, E.A., 2004. Dog star rising: the canine genetic system. *Nature*  
906 *Reviews Genetics*, 5(12), 900-910.  
907
- 908 Szpiech, Z.A., Xu, J., Pemberton, T.J., Peng, W., Zöllner, S., Rosenberg, N.A. and Li, J.Z., 2013.  
909 Long runs of homozygosity are enriched for deleterious variation. *The American Journal*  
910 *of Human Genetics*, 93(1), 90-102.  
911
- 912 Thompson, E.A., 2013. Identity by descent: variation in meiosis, across genomes, and in  
913 populations. *Genetics*, 194(2), 301-326.  
914
- 915 Troyer, A.F., 2006. Adaptedness and heterosis in corn and mule hybrids. *Crop science*, 46(2),  
916 528-543.  
917
- 918 vonHoldt, B.M., Cahill, J.A., Fan, Z., Gronau, I., Robinson, J., Pollinger, J.P., Shapiro, B., Wall,  
919 J. and Wayne, R.K., 2016. Whole-genome sequence analysis shows that two endemic  
920 species of North American wolf are admixtures of the coyote and gray wolf. *Science*  
921 *Advances*, 2(7), e1501714.  
922
- 923 vonHoldt, B.M., Pollinger, J.P., Earl, D.A., Knowles, J.C., Boyko, A.R., Parker, H., Geffen, E.,  
924 Pilot, M., Jedrzejewski, W., Jedrzejewska, B., Sidorovich, V., Greco, C., Randi, E.,  
925 Musiani, M., Kays, R., Bustamante, C.D., Ostrander, E.A., Novembre, J. and Wayne,  
926 R.K., 2011. A genome-wide perspective on the evolutionary history of enigmatic wolf-  
927 like canids. *Genome Research*, 21(8), 1294-1305.  
928
- 929 vonHoldt, B.M., Stahler, D.R., Smith, D.W., Earl, D.A., Pollinger, J.P. and Wayne, R.K., 2008.  
930 The genealogy and genetic viability of reintroduced Yellowstone grey wolves. *Molecular*  
931 *Ecology*, 17(1), 252-274.  
932
- 933 Vucetich, J., 2016. Introducing the wolf: Should humans intervene when climate change  
934 threatens an island's ecology? *Natural History*, 124(7), 20-23.  
935
- 936 Vucetich, J.A., Peterson, R.O. and Waite, T.A., 1997. Effects of social structure and prey  
937 dynamics on extinction risk in gray wolves. *Conservation Biology*, 11(4), 957-965.  
938

- 939 Wayne, R.K., Lehman, N., Girman, D., Gogan, P.J.P., Gilbert, D.A., Hansen, K., Peterson, R.O.,  
940 Seal, U.S., Eisenhaver, A., Mech, L.D. and Krumenaker, R.J., 1991. Conservation  
941 genetics of the endangered Isle Royale gray wolf. *Conservation Biology*, 41-51.  
942
- 943 Zhang, W., Fan, Z., Han, E., Hou, R., Zhang, L., Galaverni, M., Huang, J., Liu, H., Silva, P., Li,  
944 P., Pollinger, J.P., Du, L., Zhang, X., Yue, B., Wayne, R.K. and Zhang, Z., 2014.  
945 Hypoxia adaptations in the grey wolf (*Canis lupus chanco*) from Qinghai-Tibet Plateau.  
946 *PLoS Genetics*, 10(7), e1004466.  
947  
948

## Main Text Figures and Tables

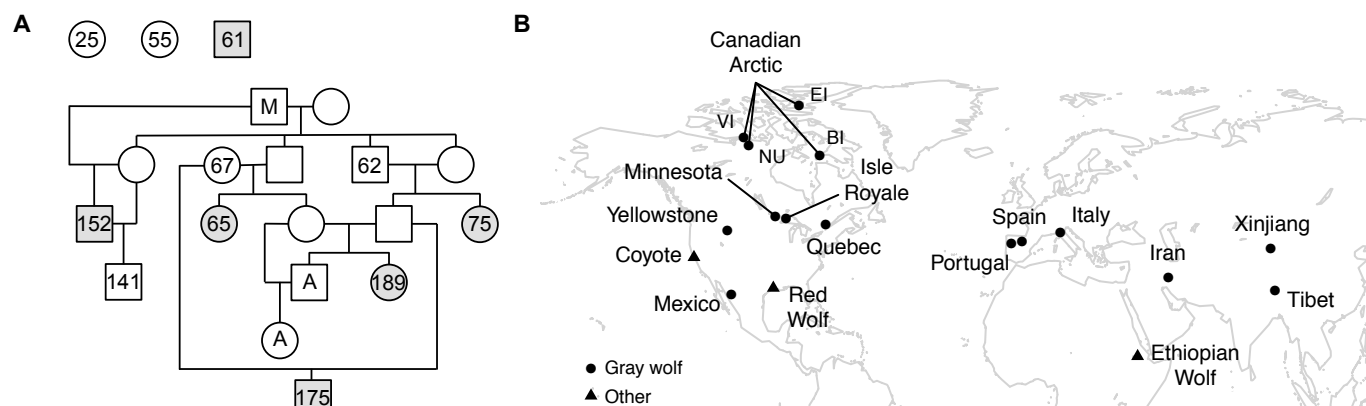

**Fig. 1. Isle Royale wolf pedigree and geographic origins of genomes in this study. (A)** Pedigree of Isle Royale wolves sequenced in this study (numbered individuals), adapted from Hedrick et al. (2014). Circles represent females and squares represent males. Relationships were inferred from genotypes at 18 microsatellite loci. Shaded individuals were examined for the presence of vertebral abnormalities for this study (see Table 1). The ancestries of F25, F55, M61, and F67 are unknown. “M” was a wolf that migrated from the mainland in 1997 (Adams et al. 2011). The “A” individuals are the last two wolves alive on Isle Royale as of 2018. **(B)** Map showing approximate origins of all individuals analyzed in this study. Abbreviations: BI, Baffin Island; EI, Ellesmere Island; NU, Nunavut; VI, Victoria Island. See Table S1 for further sample information.

**Table 1. Vertebral phenotypes of Isle Royale wolves.** Six individuals were examined for vertebral defects, and their phenotypes are listed. LSTV: lumbosacral transitional vertebra, SCTV: sacrococcygeal transitional vertebra, TLTV: thoracolumbar transitional vertebra. “N/A” indicates that the bones from this individual could not be recovered and therefore were not examined.

| ID   | Vertebrae examined | Phenotype                                                                    | Other observations                                                                                                                                |
|------|--------------------|------------------------------------------------------------------------------|---------------------------------------------------------------------------------------------------------------------------------------------------|
| F25  | N/A                | N/A                                                                          | N/A                                                                                                                                               |
| F55  | N/A                | N/A                                                                          | N/A                                                                                                                                               |
| M61  | Atlas-Sacrum       | No abnormalities                                                             | N/A                                                                                                                                               |
| M62  | N/A                | N/A                                                                          | N/A                                                                                                                                               |
| F65  | Atlas-T12, L1-Co3  | Minor phenotypic LSTV                                                        | One thoracic vertebra missing from collection                                                                                                     |
| F67  | N/A                | N/A                                                                          | N/A                                                                                                                                               |
| F75  | Atlas-Co16         | LSTV, TLTV, SCTV, 2 extra ribs, osteophytes                                  | All of F75 pups had an extra presacral vertebra, 7 of the 8 pups had extra ribs                                                                   |
| M141 | N/A                | N/A                                                                          | N/A                                                                                                                                               |
| M152 | Atlas-Sacrum       | TLTV, SCTV, extra rib, osteophytes                                           | N/A                                                                                                                                               |
| M175 | Atlas-Co9          | LSTV, TLTV, SCTV, asymmetry at Co2, osteophytes                              | Some ribs are missing from collection                                                                                                             |
| F189 | Atlas-Co2          | TLTV, extra vertebra, SCTV, cervical intrasegmental transitional & asymmetry | Some ribs are missing from collection. The cervical malformation is the same type observed in specimen 3529 (see Fig. 3 of Raikonen et al. 2009). |

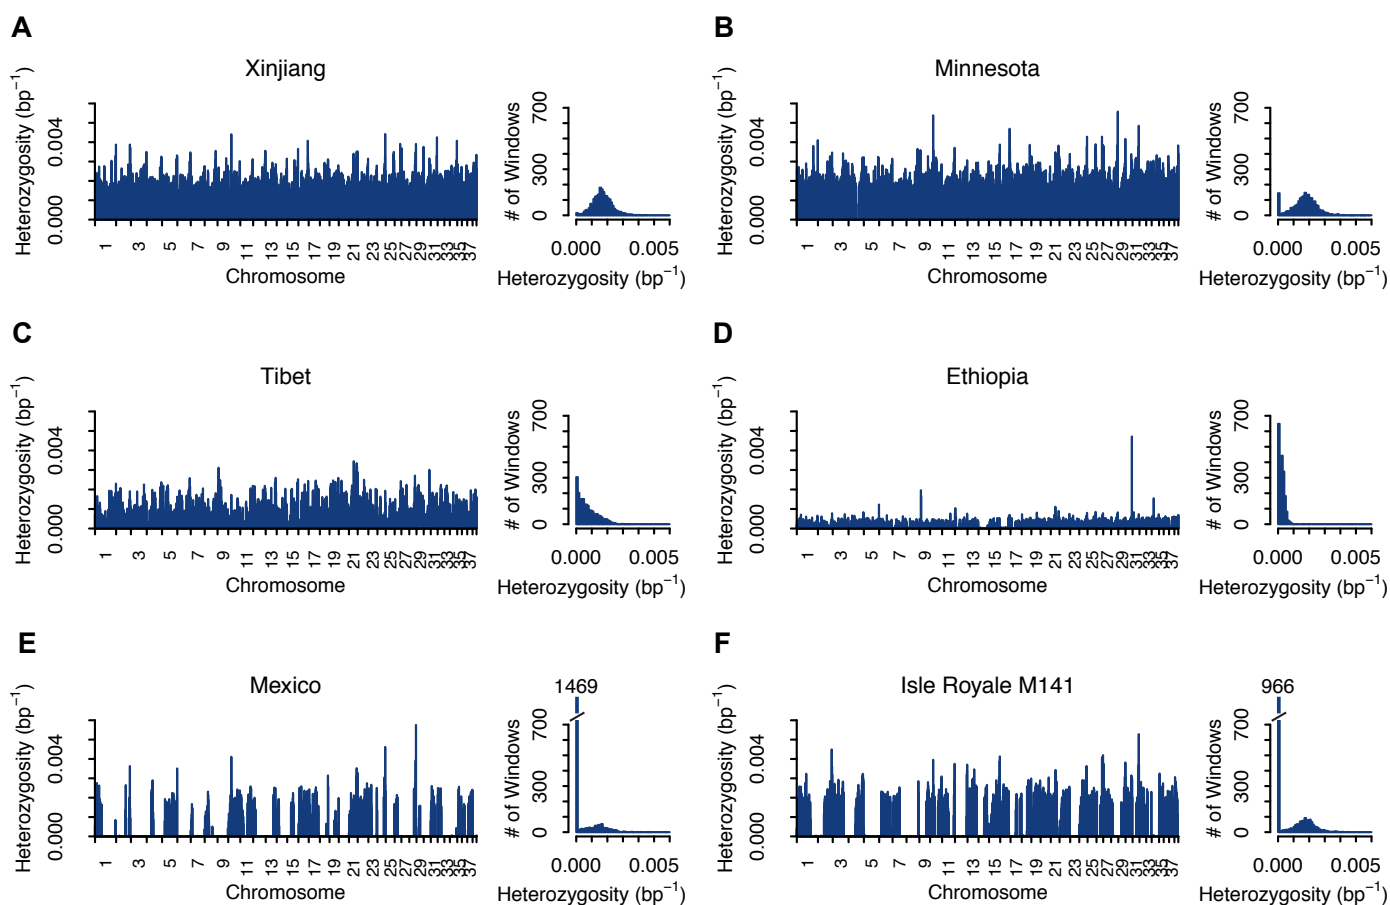

**Fig. 2. Distributions of heterozygosity across the genome.** In each panel: left, example barplots showing per-site heterozygosity in non-overlapping 1 Mb windows across the autosomal genome; right, histograms of per-window heterozygosity. (**A, B**) The Xinjiang and Minnesota wolves represent large, outbred populations. (**C, D**) The Tibetan and Ethiopian wolves represent small, isolated populations. (**E, F**) The Mexican and Isle Royale wolves represent populations with recent inbreeding. See Fig. S2 for plots of all individuals.

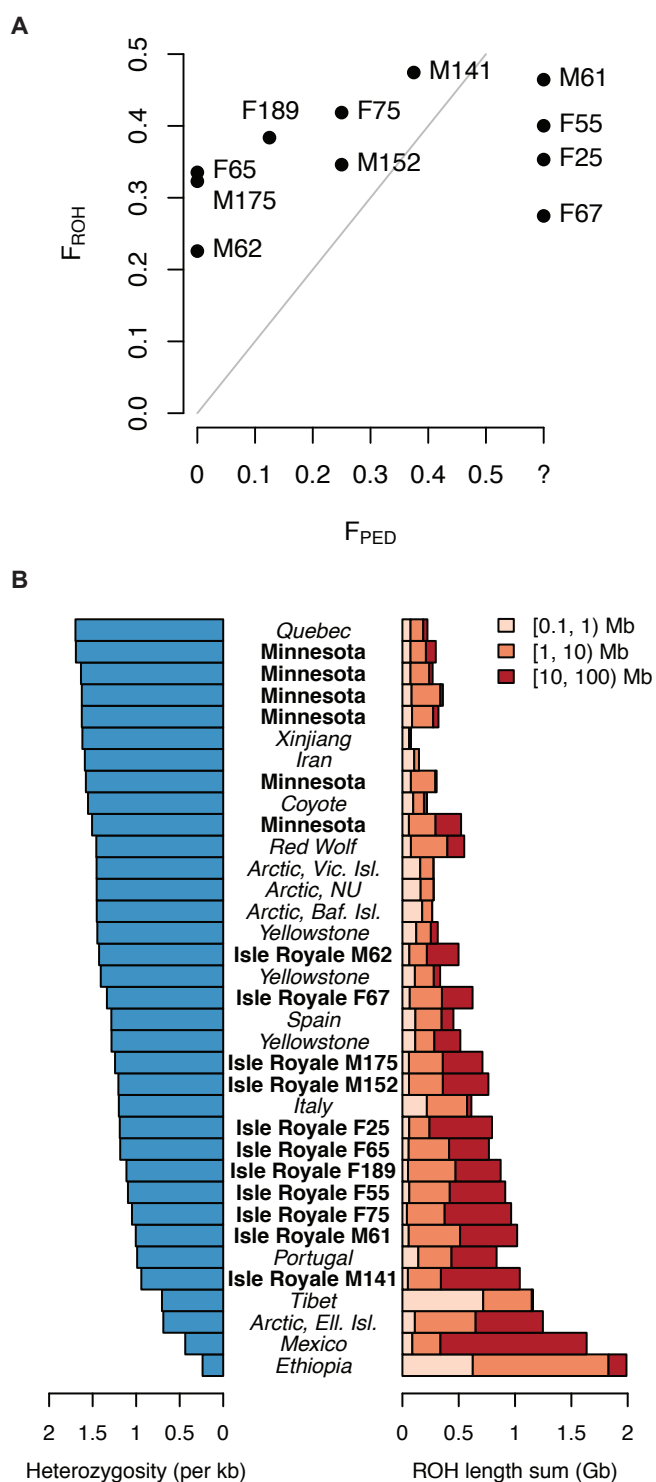

**Fig. 3. ROH and the correspondence with  $F_{\text{PED}}$  and genome-wide heterozygosity.** (A)  $F_{\text{ROH}}$  is the proportion of the genome contained within  $\text{ROH} \geq 100\text{kb}$ .  $F_{\text{PED}}$  values were calculated from the pedigree of Hedrick et al. (2014) (Fig. 1A). The grey line shows the diagonal. (B) Left: Per-site autosomal heterozygosity across the autosomal genome. Samples are ordered by decreasing heterozygosity from top to bottom. Right: Summed lengths of short ( $0.1 \text{ Mb} \leq \text{ROH} < 1 \text{ Mb}$ ), medium ( $1 \text{ Mb} \leq \text{ROH} < 10 \text{ Mb}$ ), and long ( $10 \text{ Mb} \leq \text{ROH} < 100 \text{ Mb}$ ) ROH per individual.



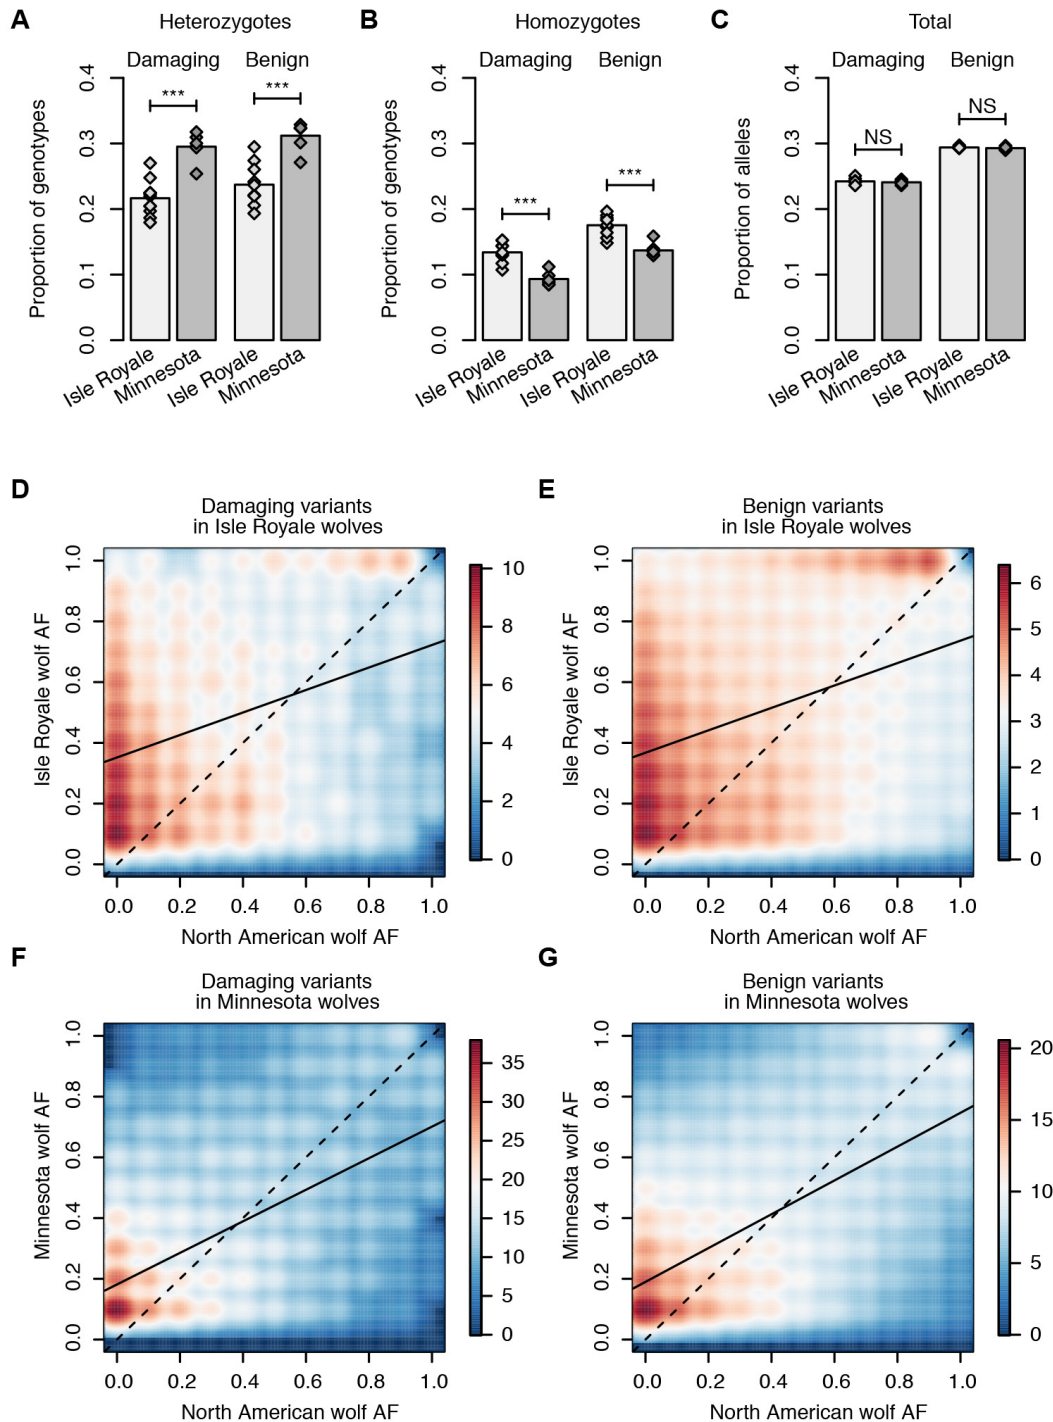

**Fig. 4. Genotype and allele frequencies in Isle Royale versus mainland Minnesota wolves.** (A) Inbred Isle Royale wolves contained significantly fewer heterozygotes and, (B) significantly more homozygotes than Minnesota wolves, for both damaging and benign SNPs. (C) The total number of derived alleles is unaffected by recent inbreeding. Significance codes: \*\*\*,  $p < 0.001$ ; NS, not significant. (D-G) Two-dimensional allele frequency spectra showing the correlation in derived allele frequencies (AF) between outbred North American wolves (Quebec, Yellowstone, Canadian Arctic excluding Ellesmere Island) and Isle Royale or Minnesota wolves, for variants present in Isle Royale or Minnesota wolves. All sites were down-sampled to include exactly five individuals from each group. Color represents the density of points (see legends). The dashed line represents the diagonal, whereas the solid line represents the linear regression line (see Table S3). (D) 3,697 sites, (E) 48,326 sites, (F) 5,216 sites, (G) 63,893 sites.

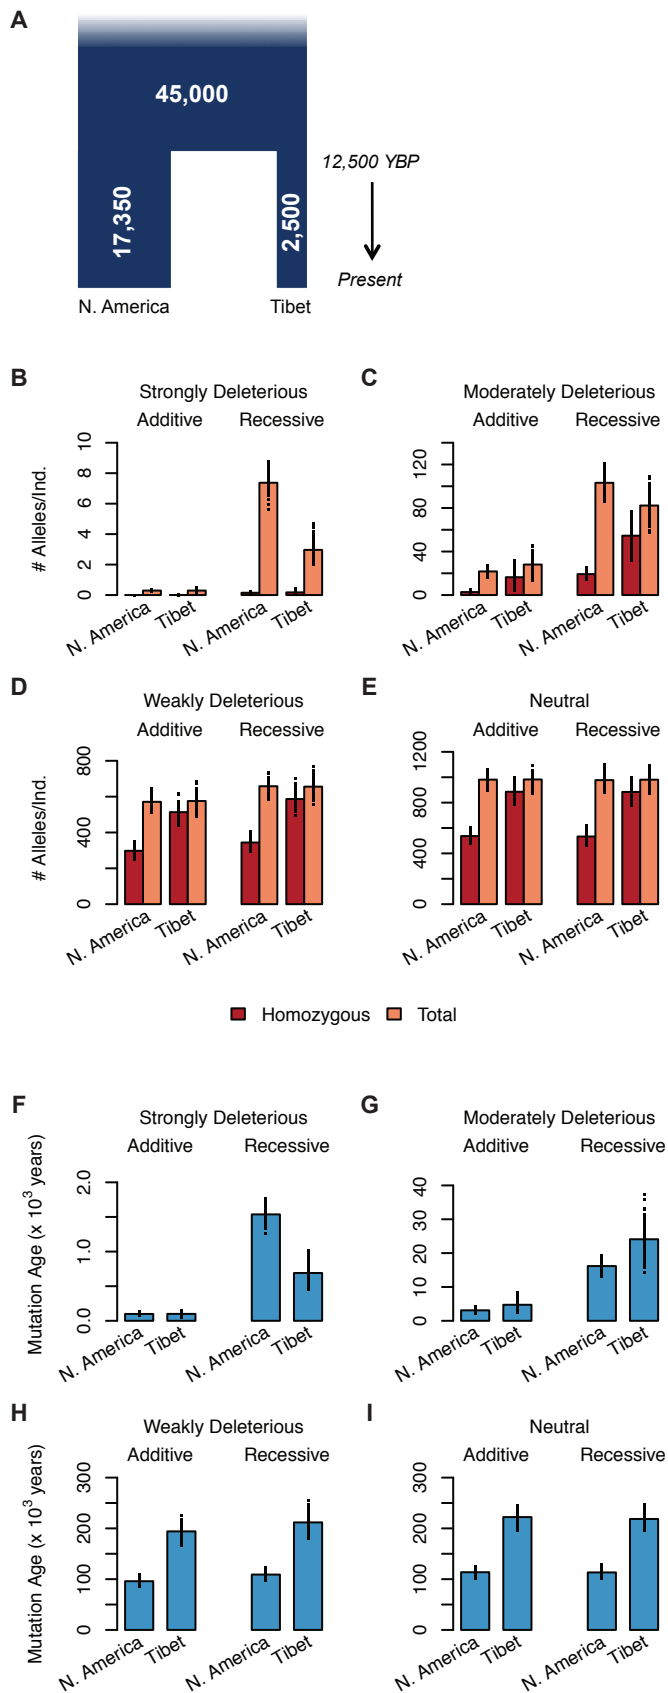

**Fig. 5. Model and results from simulations of deleterious variation.** (A) Demographic model used to simulate the expected number and age of mutations in a large population (N. America, 17,350 individuals) versus a small population (Tibet, 2,500 individuals). Both populations split from a large ancestral population (45,000 individuals) 12,500 years before present (3-year generation time). Population sizes and split time from Fan et al. (2016). Model not drawn to scale. (B-I) Results from simulations, grouped according to dominance and selection coefficients. Additive:  $h=0.5$ , recessive  $h=0$ ; strongly deleterious,  $N_e s > 100$ ; moderately deleterious,  $100 \geq N_e s > 10$ ; weakly deleterious,  $10 \geq N_e s > 0$ ; neutral:  $N_e s = 0$ . (B-E) The average number of homozygous and total alleles per individual. (F-I) The average ages of segregating mutations in each population.

## Supplemental Figures and Tables

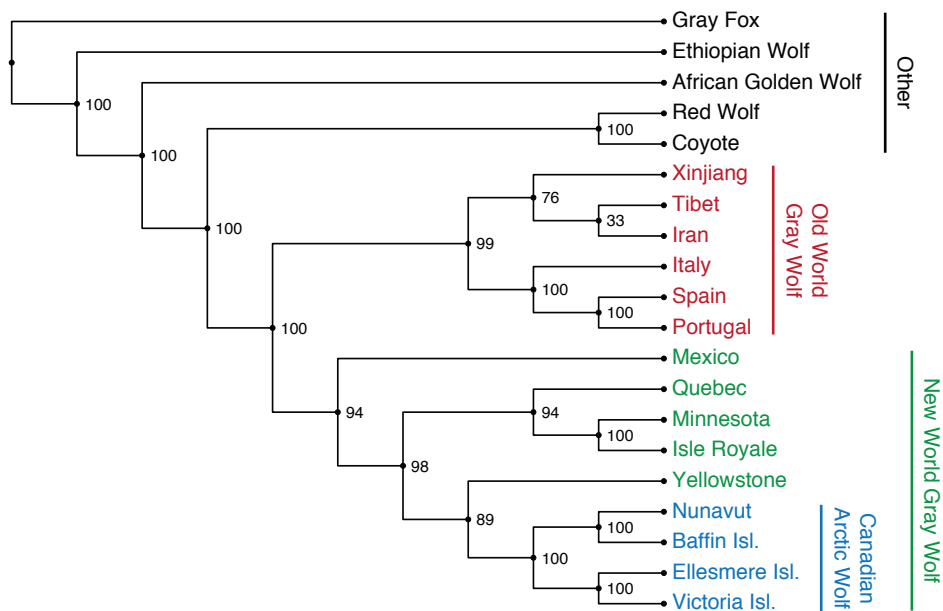

**Fig. S1. Cladogram of genome sequences in this study.** A phylogeny of 20 genome sequences based on 28,651 SNPs pruned for linkage disequilibrium shows the relationships among wolf populations and sister taxa. Where multiple individuals were available from a single population, one individual was chosen at random for inclusion in the tree (Minnesota: RKW119, Isle Royale: CL141, Yellowstone: 569F). Percentage of support from 1,000 bootstrap replicates is indicated at each node.

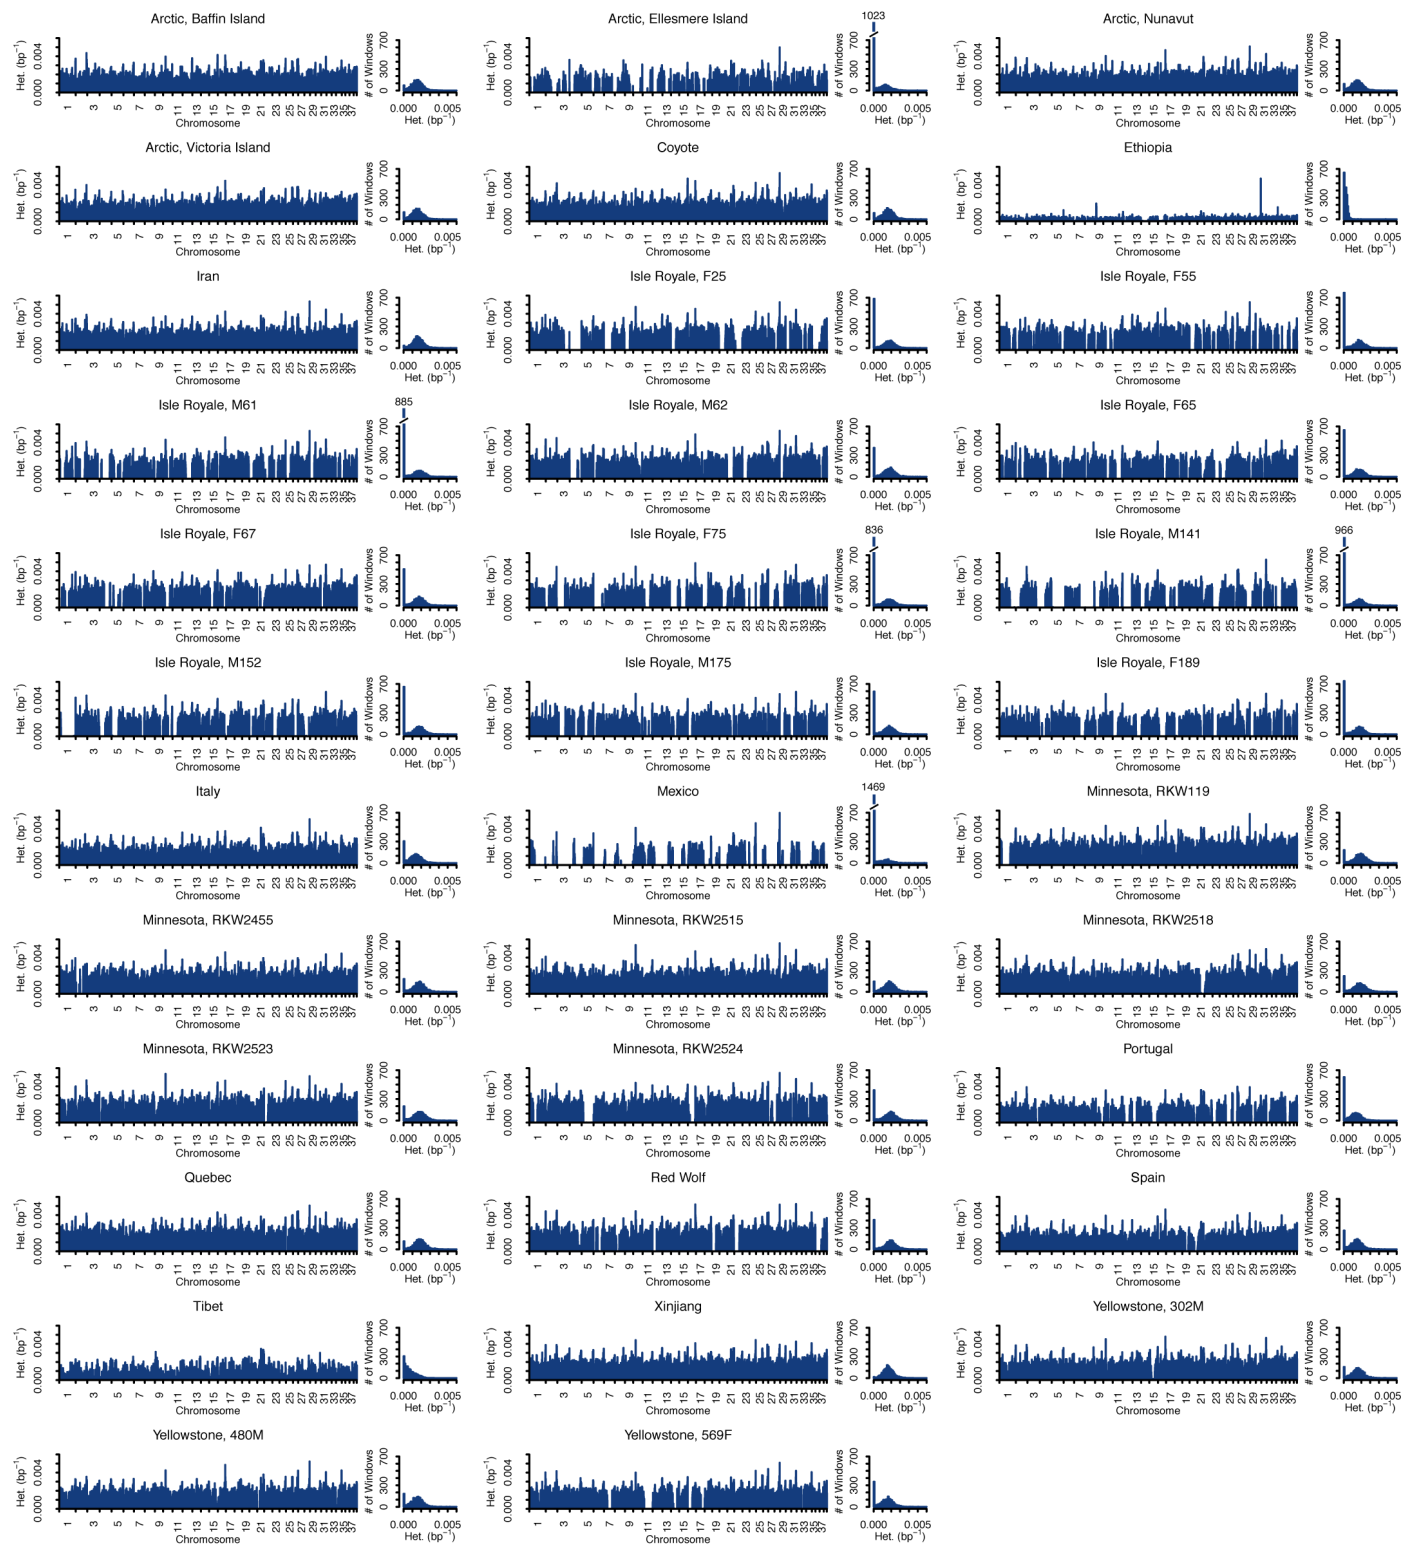

**Fig. S2. Distributions of heterozygosity in all individuals.** In each panel: left, example barplots showing per-site heterozygosity in non-overlapping 1 Mb windows across the autosomal genome; right, histograms of per-window heterozygosity.

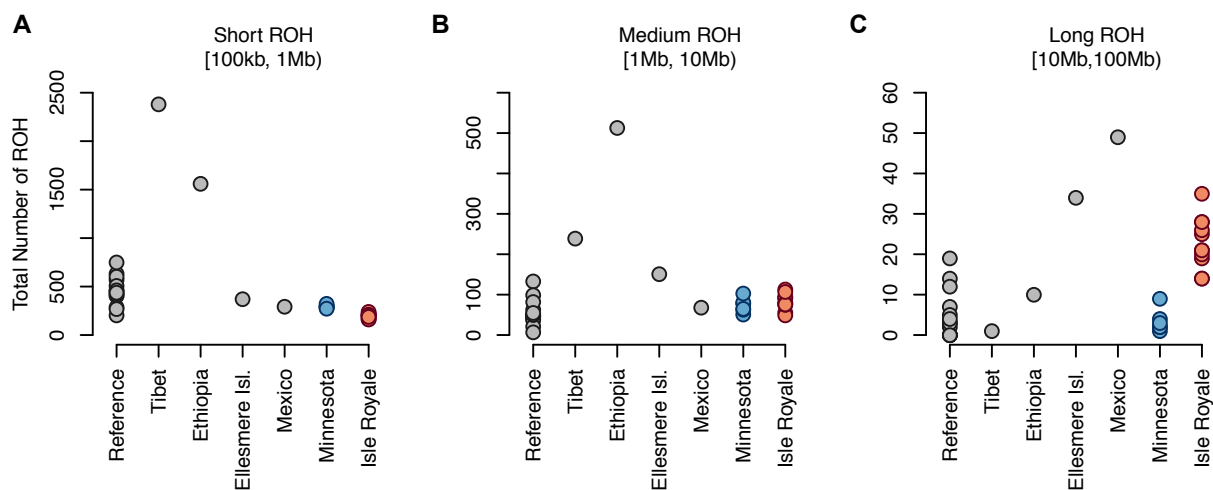

**Fig. S3. Number of ROH per individual for different ROH length categories.** The number of ROH in various size classes is indicative of demographic history. “Reference” individuals include gray wolves from Canadian Arctic (except Ellesmere Island), Quebec, Yellowstone, Iran, Italy, Spain, Portugal, and Xinjiang, plus the red wolf and California coyote. (A) Short ROH indicate ancient inbreeding, as in the Tibetan wolf. (B) Medium ROH indicate ancient and historic inbreeding, as in the Ethiopian wolf. (C) Long ROH indicate recent inbreeding, as in the Mexican, Isle Royale, and Ellesmere Island wolves.

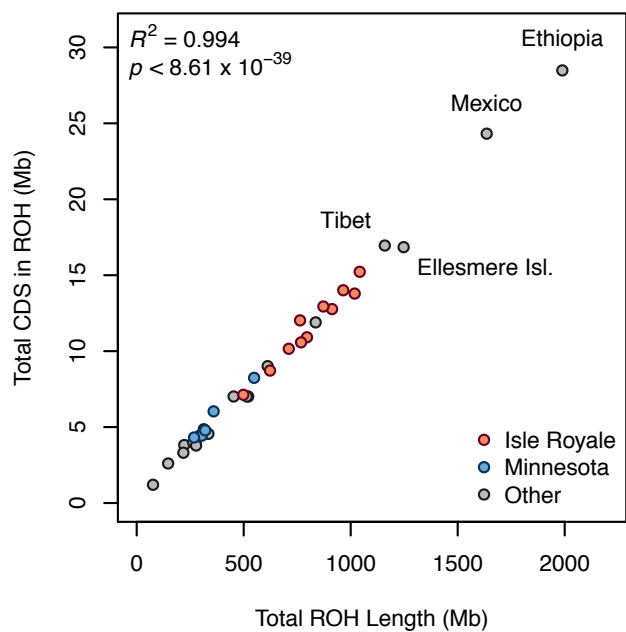

**Fig. S4. Amount of coding DNA sequence in ROH as a function of the amount of the genome within ROH.**  $R^2$  correlation and  $p$ -value coefficients were obtained by linear regression.

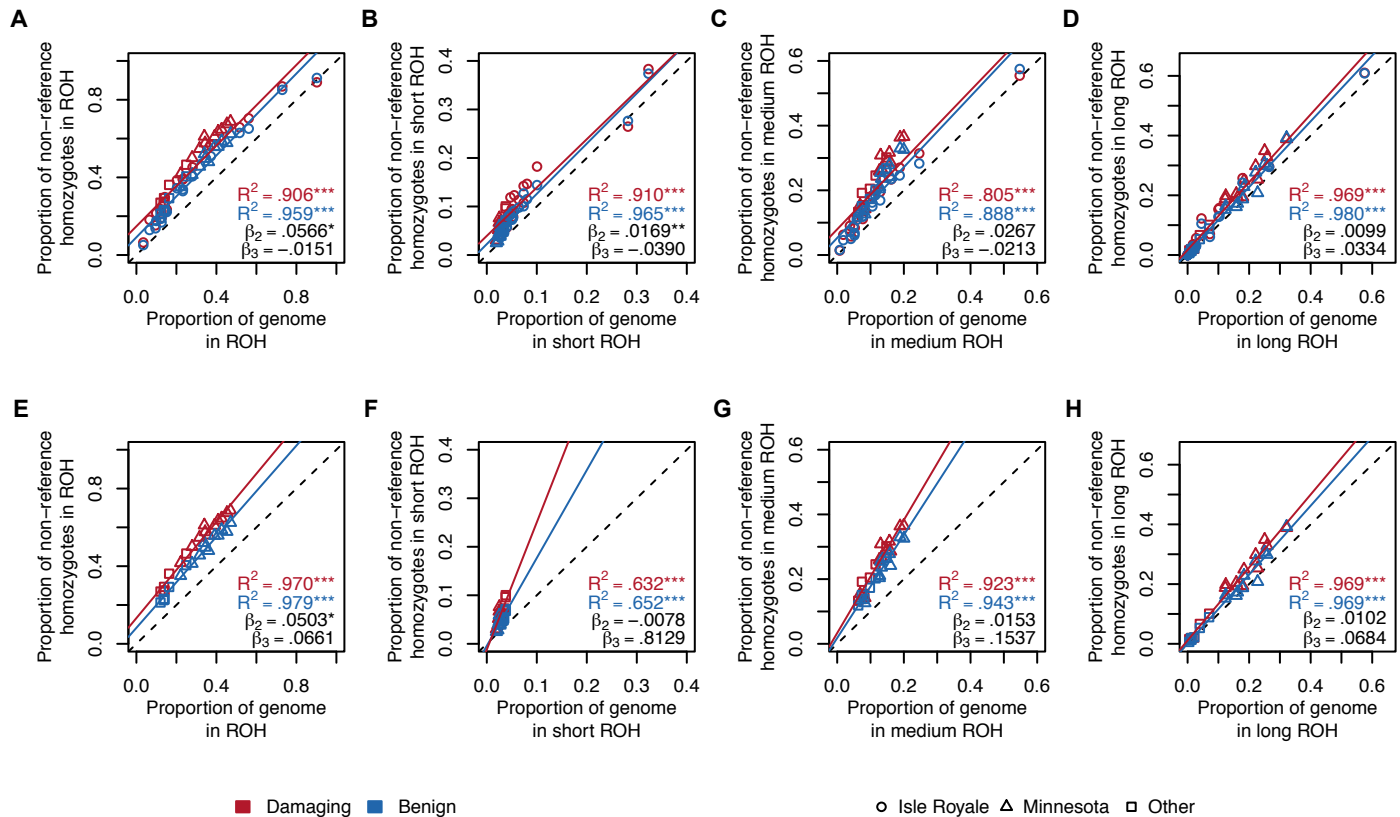

**Fig. S5. Proportion of non-reference homozygotes in ROH as a function of the proportion of the genome within ROH.** Following Szpiech et al. 2013, the proportion of non-reference homozygotes was calculated for benign and damaging variants and plotted against the proportion of the genome within ROH in all 35 individuals (A-D) and just Isle Royale and Minnesota wolves (E-H). Linear regression correlation coefficients ( $R^2$ ) and their significance are indicated. The  $\beta$ -coefficients were calculated as in Equation 10 of Szpiech et al. 2013.  $\beta_2$  and  $\beta_3$  indicate the change in intercept and slope, respectively, for damaging variants relative to benign variants. Significance codes: \*\*\*,  $p < 0.001$ ; \*\*,  $p < 0.01$ ; \*,  $p < 0.05$ .

**Fig. S6. Candidate genes underlying Isle Royale phenotypes associated with HPO terms related to skeletal anatomy.** Genes containing candidate mutations in ROH within affected Isle Royale wolves (F65, F75, M152, M175, F189; see Table 1 of main text) were identified. Candidate genes associated with HPO terms related to skeletal development are shown, with the number of affected individuals carrying the homozygous derived allele indicated in parentheses. HPO terms are nested, as shown.

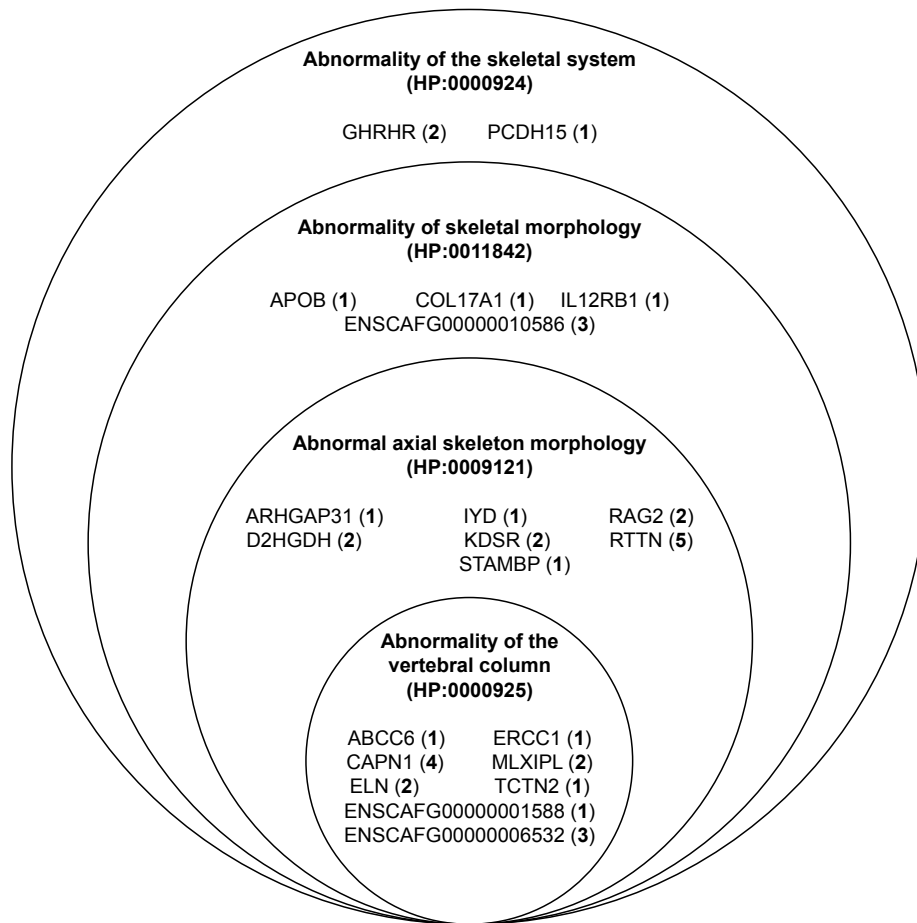



**Table S1. Sample information for sequences included in this study.** Except where noted, analyses included all individuals listed except the African golden wolf and gray fox, which were used for polarization of alleles as ancestral or derived.

| Genome                   | Species                         | Other ID(s)            | Year Sampled | Coverage (X) | Source                           |
|--------------------------|---------------------------------|------------------------|--------------|--------------|----------------------------------|
| Isle Royale              | <i>Canis lupus</i>              | F25                    | 1988         | 22.8         | This study                       |
| Isle Royale              | <i>Canis lupus</i>              | F55                    | 1998         | 25.0         | This study                       |
| Isle Royale              | <i>Canis lupus</i>              | M61                    | 2001         | 22.7         | This study                       |
| Isle Royale              | <i>Canis lupus</i>              | M62                    | 2001         | 23.6         | This study                       |
| Isle Royale              | <i>Canis lupus</i>              | F65                    | 2003         | 22.8         | This study                       |
| Isle Royale              | <i>Canis lupus</i>              | F67                    | 2003         | 24.1         | This study                       |
| Isle Royale              | <i>Canis lupus</i>              | F75                    | 2007         | 23.8         | This study                       |
| Isle Royale              | <i>Canis lupus</i>              | M141                   | 2009         | 23.4         | This study                       |
| Isle Royale              | <i>Canis lupus</i>              | M152                   | 2009         | 23.2         | This study                       |
| Isle Royale              | <i>Canis lupus</i>              | M175                   | 2009         | 24.2         | This study                       |
| Isle Royale              | <i>Canis lupus</i>              | F189                   | 2012         | 23.8         | This study                       |
| Minnesota                | <i>Canis lupus</i>              | RKW119                 |              | 19.9         | This study                       |
| Minnesota                | <i>Canis lupus</i>              | RKW2455                |              | 24.3         | DOI:10.1101/gr.197517.115        |
| Minnesota                | <i>Canis lupus</i>              | RKW2515                |              | 23.4         | This study                       |
| Minnesota                | <i>Canis lupus</i>              | RKW2518                |              | 21.5         | This study                       |
| Minnesota                | <i>Canis lupus</i>              | RKW2523                |              | 22.9         | This study                       |
| Minnesota                | <i>Canis lupus</i>              | RKW2524                |              | 20.5         | This study                       |
| Arctic, Baffin Island    | <i>Canis lupus</i>              | RKW7639, CD130         |              | 49.4         | This study                       |
| Arctic, Ellesmere Island | <i>Canis lupus</i>              | RKW7640, GF44          |              | 48.3         | This study                       |
| Arctic, Nunavut          | <i>Canis lupus</i>              | RKW7649, CB177         |              | 35.8         | This study                       |
| Arctic, Victoria Island  | <i>Canis lupus</i>              | RKW7619, CB215         |              | 31.0         | This study                       |
| Quebec                   | <i>Canis lupus</i>              | 0833M                  |              | 25.5         | This study                       |
| Iran                     | <i>Canis lupus</i>              | RKW3073                |              | 26.3         | DOI:10.1101/gr.197517.115        |
| Italy                    | <i>Canis lupus</i>              | RKW2735, W40           |              | 12.0         | DOI:10.1101/gr.197517.115        |
| Mexico                   | <i>Canis lupus</i>              | RKW3747, Ghost Ranch 6 |              | 23.6         | DOI:10.1101/gr.197517.115        |
| Portugal                 | <i>Canis lupus</i>              | RKW13461, 423          |              | 24.4         | DOI:10.1101/gr.197517.115        |
| Spain                    | <i>Canis lupus</i>              | WIB98                  |              | 22.7         | DOI:10.1101/gr.197517.115        |
| Yellowstone              | <i>Canis lupus</i>              | RKW1547, 569F          |              | 25.7         | DOI:10.1101/gr.197517.115        |
| Yellowstone              | <i>Canis lupus</i>              | RKW938, 302M           |              | 24.1         | Provided by Rena M. Schweizer    |
| Yellowstone              | <i>Canis lupus</i>              | RKW986, 480M           |              | 18.9         | Provided by Rena M. Schweizer    |
| Tibet                    | <i>Canis lupus</i>              | TI09                   |              | 24.8         | DOI:10.1371/journal.pgen.1004466 |
| Xinjiang                 | <i>Canis lupus</i>              | XJ30                   |              | 25.8         | DOI:10.1371/journal.pgen.1004466 |
| Ethiopia                 | <i>Canis simensis</i>           |                        |              | 9.1          | Provided by Thomas P. Gilbert    |
| Coyote                   | <i>Canis latrans</i>            | RKW13455, C106         |              | 24.3         | DOI:10.1101/gr.197517.115        |
| Red Wolf                 | <i>Canis rufus</i>              | RKW701, RW179          |              | 27.2         | DOI:10.1101/gr.197517.115        |
| African Golden Wolf      | <i>Canis aureus</i>             |                        |              | 24.8         | DOI:10.1016/j.cub.2015.06.060    |
| Gray Fox                 | <i>Urocyon cinereoargenteus</i> | GF41F                  |              | 17.0         | DOI:10.1016/j.cub.2016.02.062    |

**Table S2. Notes and information from the literature about the demographic history of populations included in this study.** Table adapted from Table 1 of vonHoldt et al. 2011.

| <b>Species</b>                                            | <b>Population</b>                                                     | <b>Description</b>                                                                             | <b>References</b>                                                           |
|-----------------------------------------------------------|-----------------------------------------------------------------------|------------------------------------------------------------------------------------------------|-----------------------------------------------------------------------------|
| <b>North American gray wolf</b><br>( <i>Canis lupus</i> ) | Isle Royale NP, Michigan, US                                          | Small insular population, naturally colonized by wolves from nearby mainland, inbred           | Mech 1966; Peterson & Page 1988; Gray et al. 2009; vonHoldt et al. 2011     |
|                                                           | Minnesota, US                                                         | Large mainland population near Isle Royale with history of coyote admixture                    | Gray et al. 2009; vonHoldt et al. 2011                                      |
|                                                           | Quebec, Canada                                                        | Large mainland population with history of coyote admixture                                     | Gray et al. 2009; vonHoldt et al. 2011                                      |
|                                                           | Canadian Arctic (Baffin Isl., Ellesmere Isl., Nunavut, Victoria Isl.) | Large, outbred population, some indication of reduced diversity in Ellesmere Island population | Carmichael et al. 2007, 2008; Musiani et al. 2007; Gray et al. 2009         |
|                                                           | Yellowstone NP, Wyoming, US                                           | Reintroduced population of wolves derived from Canada                                          | vonHoldt et al. 2008; Gray et al. 2009                                      |
|                                                           | Mexico                                                                | Highly endangered wolf, captive management, inbred                                             | Hedrick et al. 1997; Fredrickson et al. 2007                                |
| <b>Old World gray wolf</b><br>( <i>Canis lupus</i> )      | Portugal                                                              | Small isolated population, recent bottleneck                                                   | Sastre et al. 2011; Fan et al. 2016                                         |
|                                                           | Spain                                                                 | Large population with recent decline                                                           | Ramirez et al. 2006; Gray et al. 2009; Fan et al. 2016                      |
|                                                           | Italy                                                                 | Isolated population, historic bottleneck                                                       | Lucchini et al. 2004; Fabbri et al. 2007; Gray et al. 2009; Fan et al. 2016 |
|                                                           | Iran                                                                  | Large, outbred population                                                                      | Fan et al. 2016                                                             |
|                                                           | Xinjiang, China                                                       | Large, outbred population                                                                      | Zhang et al. 2014; Fan et al. 2016                                          |
| <b>Ethiopian wolf</b><br>( <i>Canis simensis</i> )        | Tibet, China                                                          | Historically small, isolated population                                                        | Zhang et al. 2014; Fan et al. 2016                                          |
|                                                           | Ethiopia                                                              | Historically isolated, fragmented population in decline                                        | Gottelli et al. 1994, 2004                                                  |
| <b>Coyote</b><br>( <i>Canis latrans</i> )                 | California, US                                                        | Large expanding population, no history of wolf admixture                                       | Roy et al. 1994                                                             |
| <b>Red wolf</b><br>( <i>Canis rufus</i> )                 | Southeastern US                                                       | Endangered coyote-like canid, likely hybrid origin, captive management                         | Roy et al. 1994; vonHoldt et al. 2011                                       |
| <b>African golden wolf</b><br>( <i>Canis anthus</i> )     | Kenya                                                                 | Outgroup, used to polarize ancestral v. derived alleles                                        | Koepfli et al. 2015                                                         |
| <b>Gray fox</b><br>( <i>Urocyon cinereoargenteus</i> )    | California, US                                                        | Outgroup, used to polarize ancestral v. derived alleles                                        | Robinson et al. 2016                                                        |

**Table S3. Parameters of linear regression models for two-dimensional allele frequency spectra.** Spectra are shown in main text (Fig. 4 D-G).

| <b>Populations</b>                             | <b>Type</b> | <b>Intercept</b> | <b>Slope</b> | <b><math>R^2</math></b> | <b><math>p</math>-value</b> |
|------------------------------------------------|-------------|------------------|--------------|-------------------------|-----------------------------|
| Isle Royale wolves<br>v. North American wolves | Damaging    | 0.345            | 0.379        | 0.131                   | <2.22e-16                   |
|                                                | Benign      | 0.367            | 0.370        | 0.138                   | <2.22e-16                   |
| Minnesota wolves<br>v. North American wolves   | Damaging    | 0.181            | 0.525        | 0.353                   | <2.22e-16                   |
|                                                | Benign      | 0.190            | 0.556        | 0.400                   | <2.22e-16                   |
